# 1    **The symmetrical pattern of base-pair substitutions rates across the chromosome in** 2    ***Escherichia coli* has multiple causes**

3

4    Brittany A. Niccum<sup>1</sup>, Heewook Lee<sup>2</sup>, Wazim MohammedIsmail<sup>3</sup>, Haixu Tang<sup>3</sup>, and Patricia L. Foster<sup>1\*</sup>

5

6    <sup>1</sup>Department of Biology, Indiana University, Bloomington, IN, USA, 47405

7    <sup>2</sup>School of Computer Science, Computational Biology Department, Carnegie-Mellon University

8    <sup>3</sup>School of Informatics and Computing, Indiana University, Bloomington, IN, USA, 47405

9

10    \*Corresponding Author:

11    Patricia L. Foster

12    Department of Biology

13    Jordan Hall 447E

14    1001 East Third Street

15    Indiana University

16    Bloomington, IN 47405

17    812-855-4084

18    plfoster@indiana.edu

19

20    Author email addresses:

21    Patricia L. Foster, plfoster@indiana.edu

22    Brittany A. Niccum, brittanyniccum@gmail.com

23 Heewook Lee, heewookl@cs.cmu.edu

24 Wazim MohammedIsmail, wazimoha@indiana.edu

25 Haixu Tang, hatang@indiana.edu

## 26 **Abstract**

27 **Background:** Mutation accumulation experiments followed by whole-genome sequencing have  
28 revealed that for several bacterial species, the rate of base-pair substitutions (BPSs) varies across the  
29 chromosome in a wave-like pattern that is symmetrical about the origin of replication. The  
30 experiments presented here investigate the causes of this pattern in *Escherichia coli*.

31 **Results:** The timing of replication initiation, the progression of the replication fork, and the structure of  
32 the region where replication terminates all affect the mutational density pattern. As predicted  
33 previously, the activities of the nucleoid binding proteins, HU and Fis, are also important, suggesting  
34 that mutation rates increase when highly structured DNA regions are replicated. Biases in error-  
35 correction by proofreading and mismatch repair are major factors in establishing the pattern. A  
36 mutation accumulation experiment with mismatch-repair defective *Bacillus subtilis* revealed a similar  
37 symmetrical pattern of BPS rates.

38 **Conclusions:** The symmetrical pattern of BPS rates does not have a single cause, but is, instead  
39 determined by the initiation, progression, and termination of DNA replication, error-correction, and  
40 chromosome structure. These factors should apply to most bacterial, and possibly eukaryotic,  
41 genomes, and imply that different areas of the genome evolve at different rates.

42

43 **Keywords** *Escherichia coli*, mutation rate, mutation accumulation, whole genome sequencing,  
44 mismatch repair, replication timing, nucleoid associated proteins, proofreading

## 45    **Background**

46            Recent studies of mutations accumulated non-selectively across bacterial chromosomes have  
 47    revealed that rates of base-pair substitutions (BPSs) vary 2- to 4- fold in a wave like pattern that is  
 48    mirrored in the two independently replicating halves of the chromosome. Such symmetrical patterns  
 49    have been observed in mismatch-repair (MMR) defective strains of *Escherichia coli* (1), *Vibrio fischeri*,  
 50    *V. cholerae* (2-4), *Pseudomonas fluorescens* (5), and *P. aeruginosa* (6). Such variation in mutation rates  
 51    may affect the rate at which genes in different regions of the chromosome evolve, and may exert  
 52    selective pressure on gene placement. Yet the causes of this variation are not known.

53            The fidelity of DNA replication, which, in *E. coli*, is about 1 mistake in 1000 generations (7), is  
 54    determined by the intrinsic accuracy of the DNA polymerase and error correction by proofreading and  
 55    mismatch repair (reviewed in (8, 9). In *E. coli*, proofreading is performed by epsilon, a subunit of the  
 56    DNA polymerase III holoenzyme. If the polymerase inserts the incorrect base, epsilon's 5' to 3'  
 57    exonuclease activity degrades a few bases of the new strand and polymerase then re-synthesizes it.  
 58    The accuracy of DNA synthesis is improved about 4000-fold by proofreading (10). Mismatch repair is  
 59    performed by three proteins, MutS, MutL, and MutH. MutS recognizes a mismatch and recruits MutL.  
 60    Together they find a nearby GATC site in which, in *E. coli*, the A is methylated by the Dam methylase.  
 61    Because methylation lags behind replication, unmethylated As identify the "new", and presumably  
 62    error-containing, DNA strand. MutH is recruited by MutSL to the GATC site and activated to nick the  
 63    unmethylated DNA strand, which is then degraded past the mismatch by the concerted activity of the  
 64    UvrD helicase and one of four exonucleases. Pol III then re-synthesizes the strand. MMR improves the  
 65    accuracy of DNA replication 100 to 200 fold (11).

In our previous study of the BPS density pattern in MMR-defective *E. coli* (1), we correlated mutation rates to the chromosomal sites that are affected by two nucleoid-associated proteins (NAPs), HU and Fis. We suggested that when the replication fork encounters regions of the chromosome with high superhelical density due to the binding of these NAPs, the mutation rate increases. An alternative explanation ties mutation rates to replication timing (2, 3). An intriguing hypothesis is that mutation rates vary in concert with fluctuations in dNTP concentration when the replication origin fires repeatedly during rapid growth (2).

In the work presented here, we investigate further the causes of the wave-like pattern of BPS rates. MMR-defective strains of *E. coli* additionally defective for other activities were used in mutation accumulation (MA) experiments and the mutations identified by whole genome sequencing (WGS). We also investigated the effects of different growth conditions on BPS rates. We conclude that the BPS density pattern does not have a single cause, but is the result of several factors affecting DNA replication, repair, and chromosome structure. In addition, we report that a MMR-defective *Bacillus subtilis* also has a wave-like BPS density pattern that is symmetrical about the origin of replication.

## Results

### The base-pair substitution (BPS) density pattern in mismatch repair-defective strains

In a previous paper (1) we demonstrated that the density of BPS that accumulated across the chromosome in a MMR-defective strain during an MA experiment fell into a wave-like pattern that was symmetrical about the origin. We have since performed nine additional MA experiments with MMR mutant strains, each experiment resulting in the accumulation of over 1000 BPSs, for a total of 30,061 BPSs (11). As shown in Fig. 1A, the wave-like BPS density pattern was reproducible among the 10 experiments. Also as shown in Fig. 1A, the mutational density pattern does not exactly match the non-

88 interacting chromosomal macrodomains (MCs) as defined by Valens et al, 2004 (12). In particular, the  
89 wave pattern of BPSs is symmetrical about the origin whereas the Ori MC is not.

90 Following the analysis of Dillon et al, 2018 (2), we computed the wavelet coherence of the  
91 collected MMR<sup>-</sup> data taken in the clockwise and the counterclockwise directions around the  
92 chromosome; Additional file 1: Fig. S1A shows that, except for some asymmetry at the midpoint, the  
93 wave is symmetrical across the chromosome. The coherence is greatest between 800 to 1,600 Kb per  
94 cycle (= 8 to 16 bins per cycle), which is a similar result to that found by Dillon et al, 2018 (2). We also  
95 computed the wavelet coherence of the collected MMR<sup>-</sup> data against each of the experimental results  
96 discussed below, and these graphs are also given in the Additional file material. In the analyses below,  
97 the combined data from the 10 experiments with MMR-defective strains are used as the standard to  
98 which the results obtained in other genetic backgrounds are compared.

99 The spectrum of BPSs in the MMR-defective strains is dominated by A:T transitions at  
100 5'NAC3'/3'NTG5' sites (11). To test if the mutational density pattern was simply due to the distribution  
101 of these sites, we removed all the A:T transitions at 5'NAC3'/3'NTG5' sites from the data set. As shown  
102 in Additional file1: Figs. S5A, S6A, and Tables 1 and 2, although the mutation rate was reduced by 60%  
103 when these BPSs were removed, the remaining 12,542 BPSs fell into the same wave pattern. Thus, the  
104 variation in BPS rates must be reflective of regions of the chromosome and not the distribution of the  
105 hotspot DNA sequences.

## 106 **Transcription**

107 One obvious hypothesis is that the mutational density pattern reflects transcriptional patterns.  
108 Mutation rates have been reported to be both increased (13) and decreased (14) by high levels of  
109 transcription. In a previous paper (7) we reported that highly expressed genes had normal mutation

110 rates, a finding that was confirmed in a recent study using deep sequencing to detect mutations (15).  
 111 To determine if, nonetheless, transcription influences the wave pattern, we used RNA-Seq to  
 112 quantitate the RNA levels in a  $\Delta mutL$  mutant strain in the lag, exponential, and stationary phases of  
 113 growth. These results should be representative of the cells in colonies during our MA experiments. We  
 114 then compared these results to the BPS density pattern by binning the RNA-Seq results into the same  
 115 bins as used for mutational data. As shown in Fig. 1B and Additional file 1: Fig. S1B, there was no  
 116 similarity in the two data sets.

117 Because ribosomal operons are homologous, we could not call SNPs in these genes. The RNA  
 118 reads from the genes in ribosomal operons were also removed from the RNA-Seq data, but their  
 119 positions have been indicated in Fig. 1B. Interestingly, bin 35, which includes the ribosomal *rrnG*  
 120 operon, has a high number of RNA reads even in the absence of reads from the *rrnG* genes. This high  
 121 level of expression is almost exclusively due to the *ssrA* gene, which encodes transfer-messenger RNA  
 122 (16), that is highly expressed under all three conditions (the RNA-Seq data will be further analyzed in a  
 123 subsequent paper). The BPS density pattern of several of the strains that will be discussed below tends  
 124 to reach a minimum in this general area, but it is as often at bin 33 as at bin 35. Given that the bin size  
 125 is 100 Kb, it seems unlikely that the high level of transcription level of *ssrA*, located in the middle of bin  
 126 35, is causing these patterns.

## 127 **Replication Initiation**

128 The BPS density pattern is centered on *oriC*, the origin of replication, and over many experiments  
 129 in different genetic backgrounds the pattern around the origin has proved to be stable. In both  
 130 replichores BPS rates decline to a minimum about 300 Kb from the origin and then increase until a

peak is reached about 900 Kb from the origin. Mutation rates then fall again and reach a minimum about 3/5<sup>th</sup> of the distance along each replichore.

We tested whether replication initiation was responsible for the maintenance of this pattern by performing MA experiments with strains with errant replication start sites. The *rnhA* gene encodes RNase H1, which degrades RNA-DNA hybrids; in the absence of RNase H1, persistent R-loops can initiate aberrant DNA replication and disrupt normal fork migration (17, 18). But an MA experiment with a  $\Delta rnhA \Delta mutL$  mutant strain showed no difference in the BPS density pattern from that of the  $\Delta mutL$  mutant strain (Fig. 1C, Additional file 1: Fig. S1C, Tables 1 and 2), indicating that aberrant replication Initiation does not influence where mutations occur, at least not when a powerful *oriC* is present.

To further test the influence of replication initiation on the mutational density pattern, we performed MA experiments with strains that have a 5.1 Kb region containing *oriC* moved to the midpoint of the right replichore, where it is called *oriZ* (19). These strains are derived from *E. coli* K12 strain AB1157, instead of MG1655 strain, the ancestor of our MA strains, and have a large inversion in the right replichore that relieves the head-on collision between replication initiating at *oriZ* and transcription of the *rrnCABE* operon (20). As a control we created an AB1157  $\Delta mutL$  mutant strain, which had the similar wave-like BPS density pattern as our MMR<sup>-</sup> strains, indicating that the pattern is intrinsic to *E. coli* K12, not specific to sub-strain MG1655 (Additional file 1: Figs. S5B, S6B, Tables 1 and 2). We performed MA experiments on  $\Delta mutL$  derivatives of two additional strains: one with both *oriZ* and *oriC* (WX320  $\Delta mutL$ ), and one with only *oriZ* (WX340  $\Delta mutL$ ). The strain that contained two origins had a similar BPS density pattern as the MMR<sup>-</sup> strains (Fig. 1D, Additional file 1: Fig. S1D, Tables 1 and 2), suggesting that, under our conditions, firing of *oriZ* could not overcome the influence of *oriC*.

153 However, the strain containing only *oriZ* showed a decrease in BPS rate in the 200Kb-area surrounding  
154 the new origin, similar to that normally observed about *oriC* (Fig. 1E, Additional file 1: Fig. S1E, Tables 1  
155 and 2).

## 156 **SeqA**

157 As mentioned above, in *E. coli* the adenines in GATC sites are methylated by the Dam  
158 methylase. The SeqA protein binds to hemimethylated GATC sites, many of which are clustered around  
159 OriC, and, by so doing, SeqA occludes the replication initiation protein, DnaA, hindering origin firing.  
160 Sequestering of the origin persists for about one third of a generation; however, the mechanism of  
161 relief is not clear. In the absence of SeqA, unregulated initiation presumably results in over-replication,  
162 at least when cells are rapidly growing in rich medium (21). Downstream events, such as replication  
163 fork collapse, add to the phenotypes of *seqA* mutant cells (22).

164 Loss of SeqA affects chromosomal structure in areas distant from OriC. By binding to  
165 hemimethylated DNA, SeqA forms complexes behind the replication fork as it progresses around the  
166 chromosome (21). In addition, SeqA binds to areas of the chromosome with closely spaced GATC sites,  
167 as well as to particular genes regulated by GATC methylation (23). In the absence of SeqA the  
168 superhelicity of the chromosome increases, the nucleoid condenses (24), and transcription is altered  
169 (25).

170 To test whether SeqA affects the BPS density pattern, we performed an MA experiment with a  
171  $\Delta mutL \Delta seqA$  mutant strain. As shown in Fig. 1F, Additional file 1: Fig. S1F, and Tables 1 and 2, loss of  
172 SeqA somewhat amplified the BPS density pattern of the right replicore, but the pattern was still  
173 highly correlated to that of right replicore of the MMR-defective strains. However, the pattern in the  
174 left replicore was disrupted in the  $\Delta seqA \Delta mutL$  mutant strain. Based on chromatin



immunoprecipitation analysis, this area of the left replicore is not targeted by SeqA to a greater extent than the same area of the right replicore (23, 26), suggesting that the disruption of the mutational pattern is not due to loss of binding by SeqA. As shown in Fig. 1B, bins 44, 38, 37, and 35 contain a number of highly expressed genes; in addition, bins 42 and 35 contain highly transcribed ribosomal RNA genes. Thus, we hypothesize that loss of SeqA makes the replication machinery particularly susceptible to interference by transcription, disrupting the mutational pattern. If this hypothesis is correct, the interference apparently makes replication more accurate, perhaps by slowing the speed of DNA polymerase.

### **Replication Fork Progression**

In a recent report, Dillon *et al.*, 2018 (2), hypothesized that the periodic variation in mutation rates across the chromosome was tied to the timing of DNA replication. Cellular levels of dNTPs are controlled by ribonucleotide reductase (RNR), the expression of which increases when the origin fires (27, 28). In fast-growing bacteria in which new rounds of replication are initiated before cell division, the levels of dNTPs should be high when each origin fires, but then fall as progression of the multiple forks dilute the dNTPs. High levels of dNTPs are predicted to increase the probability of misincorporation, and thus the mutation rate, whereas low levels of dNTPs should slow replication and improve fidelity. This systematic fluctuation in dNTP levels could account for the pattern of mutational density across the chromosome (2).

This hypothesis can be tested by examining the wave pattern from several experiments that we have already published (11). The number of replicating chromosomes is a positive function of the cell's growth rate (29). When  $\Delta mutL$  or  $\Delta mutS$  mutant strains were grown on glucose minimal medium, which reduces the growth rate about 2-fold relative to growth on LB, the BPS density pattern became

197 chaotic (Fig. 2A, Additional file 1: Figs. S2A, S5C, S6C, Tables 1 and 2). Supplementing the minimal  
 198 medium with just enough LB to increase the growth rate to normal restored the wave-like BPS density  
 199 pattern (Fig. 2B, Additional file 1: Fig. S2B, Tables 1 and 2). Growing the cells on diluted LB, on which  
 200 the growth rate was the same as on minimal glucose medium, also preserved the wave-like BPS density  
 201 pattern (Fig. 2C, Additional file 1: Fig. S2C, Tables 1 and 2). When the cells were grown at a lower  
 202 temperature, which also reduced the growth rate 2-fold, the overall shape of the BPS density pattern  
 203 was retained, but the increases in BPS rates that normally peak at about 900 Kb from each side of the  
 204 origin were shifted about 200 Kb further from OriC (Fig. 2D, Additional file 1: Fig. S2D, Tables 1 and 2).  
 205 In addition, the magnitude of the fluctuation of the BPS rate across the chromosome was doubled.  
 206 Thus, it appears that growth rate *per se* is not a major determinant of the BPS density pattern, but  
 207 other factors, such as the composition of the growth medium, are also important. For example, the  
 208 expressions and DNA binding characteristics of nucleoid associated proteins (NAPs) are different under  
 209 different growth conditions (30-32)

210 In *E. coli* growing aerobically dNTP levels are regulated by a Class Ia RNR encoded by the *nrdA*  
 211 and *nrdB* genes. Although most of this regulation appears to be due to DnaA interactions (28), the  
 212 NrdR repressor, which regulates a poorly expressed Class Ib RNR, also regulates *nrdAB* transcription;  
 213 loss of NrdR results in increased expression of RNR throughout the cell cycle (33). Increased RNR  
 214 should result in increased dNTP levels, and, indeed, the  $\Delta nrdR \Delta mutL$  mutant strain had twice the  
 215 mutation rate as the MMR<sup>-</sup> strains, as expected when dNTP levels are high (Additional file 2: Table S1).  
 216 As shown in Fig. 2E, Additional file 1: Fig. S2E, Tables 1 and 2, loss of NrdR did not change the basic BPS  
 217 density pattern, but the peak rate was shifted away from the origin about 200 Kb on each side. This  
 218 pattern was similar to that observed when cells were grown at low temperature, as described above.

Replication fork progression is aided by the accessory replication helicase, Rep, and, in its absence, the time required for chromosome duplication is doubled (34). Rep removes proteins bound to the DNA in front of the fork (34, 35). While these nucleoproteins are primarily transcription complexes (36, 37), Rep could also free the DNA of blocking NAPs. In addition, Rep aids in restarting replication forks after they stall or collapse (38, 39). As shown in Fig. 2F, Additional file 1: Fig. S2F, Tables 1 and 2, with the exception of a region close to the origin, loss of Rep disrupted the BPS density pattern across the chromosome, suggesting that slowing or stalling the fork results in a distribution of BPS that is essentially random.

## Replication Termination

The results from almost all the strains tested show an increase in the BPS rate in the region where replication terminates. The pattern of this increase varies somewhat among experiments. Usually there are two unequal peaks, as shown in Fig.1A, but in some experiments these peaks are better defined and of equal heights and occasionally there is just one peak. We do not know the source of this variation, but suspect it is simply random noise.

Replication terminates approximately 180° from the origin in a 1200 Kb region bounded by replication pause (Ter) sites; this region extends from bin 18 to bin 31 in our Figures. The anti-helicase Tus protein binds to the Ter sites and allows each replication fork to enter but not to exit, creating a replication fork “trap”, within which the two forks fuse and the chromosome dimer is resolved (40). To determine if the interaction of replication forks with Tus contributes to the increased mutation rate within this region, we performed an MA experiment on a *Δtus ΔmutL* mutant strain. As shown in Fig. 2G, Additional file 1: Fig. S2G, Tables 1 and 2, loss of Tus did not affect the BPS density pattern.

The Ter macrodomain (MD) extends from 1200 Kb to 2200 Kb (12), which is roughly from bin 20 to bin 28 in our Figures. The structure of the Ter MD is maintained by the MatP protein, which binds to 23 *matS* sites within this region (41). In the absence of MatP, the Ter MD is disorganized, the DNA is less compact, and the Ter MD segregates too early in the cell cycle and fails to localize properly at midcell (41, 42). Because the mobility of the Ter MD is increased in the absence of MatP, DNA interactions across MD barriers can occur in  $\Delta matP$  mutant cells (41).

As shown in Fig. 2H, Additional file 1: Fig. S2H, Tables 1 and 2, loss of MatP caused a severe disruption of the BPS density pattern. The mutation rates in the Ter MD were depressed whereas new peaks appeared on either side of the Ter MD in the Right and Left MDs. Interestingly, the BPS pattern near the origin was maintained in the right but not in the left replicore.

## **Recombination and the SOS response**

Homologous recombination is intimately connected to replication. As replication proceeds, various blocks, such as DNA lesions, transcription complexes, and DNA secondary structures, can cause the replisome to pause and to eventually disassemble. This potentially lethal event is prevented by recombination, which can repair and restart the replisome (43). In addition, the termination region is subject to hyperrecombination (44, 45) particularly in the region bounded by TerA and TerB (our bins 21 to 24), named the terminal recombination zone (TRZ) (46, 47).

Elimination of *E. coli*'s major recombinase, RecA, had a modest effect on the mutational density pattern. As shown in Fig. 3A, Additional file 1: Figs. S3A, S5D, S6D, Tables 1 and 2, in the *recA mutL* and *recA mutS* mutant strains, BPS rates declined in bins 21 to 25, corresponding fairly well to the TRZ described above. However, the hyperrecombination within the TRZ is dependent on the recombination pathway defined by participation of the RecBCD complex. When we eliminated RecB, the mutational

density pattern did not phenocopy that seen when RecA was absent (Additional file 1: Figs. S5E, S6E, Tables 1 and 2). Either our protocol is not sensitive enough to detect an effect of loss of RecB, or another recombination pathway, *e.g.* RecFOR (48), is sufficient to maintain the mutation rate in the region.

In addition to its role in recombination, RecA is also a master regulator of the SOS response to DNA damage, which includes the induction of two error-prone DNA polymerases, DNA Pol IV and V. To test whether these polymerases are involved in determining the BPS density pattern, we performed an MA experiment on a strain deleted for the genes that encode Pol IV, *dinB*, and PolV, *umuDC*. As shown in Fig. 3B, Additional file 1: Fig. S3B, Tables 1 and 2, the BPS density pattern in the *mutL dinB umuDC* mutant strain was not significantly different than the MMR<sup>-</sup> pattern. The genes of the SOS response are repressed by the LexA protein; the *lexA3* allele encodes a super-repressor LexA protein that prevents the SOS genes from being induced (49). When this allele was present the BPS density pattern was also unaffected (Fig. 3C, Additional file 1: Fig. S3C, Tables 1 and 2). Thus, the SOS response appears to play no role in determining the pattern of BPSs across the chromosome.

## Nucleoid Associated Proteins

In a previous report (1), we found that the BPS density pattern of a  $\Delta$ *mutL* strain was correlated with the density of genes activated by the HU protein and repressed by the Fis protein. Combining these two factors in a linear correlation model accounted for 33% of the variation in the mutational data. HU constrains supercoils and compacts the DNA into nucleosome-like particles; Fis also constrains supercoils but, in addition, bends the DNA (31). While both of these NAPs affect transcription, the general lack of correlation of the BPS rate with transcriptional levels (7); also see above) led us to hypothesize that mutation rates across the chromosome were correlated not with

transcription *per se*, but with areas of high DNA structure (1). To further test this hypothesis we preformed MA experiments with MMR<sup>-</sup> mutant strains also defective for each of a number of NAPs. HU exists as a dimer of its two subunits, HU $\alpha$  and HU $\beta$ , encoded by the paralogous genes *hupA* and *hupB*, respectively, in the three possible configurations. While loss of both subunits confers a severe growth defect, loss of only one has little consequence during a normal growth cycle, suggesting they can substitute for each other. HU $\alpha\beta$  is the dominant form over most of the cell cycle, but significant amounts of HU $\alpha_2$  are found during lag phase and early exponential phase, and HU $\beta_2$  is prominent in stationary phase (30). Chromatin immunoprecipitation sequencing (ChIP-Seq) results revealed that HU binds non-specifically to the chromosome and the DNA binding patterns of the three dimers appear to be identical (50).

We performed MA experiments with both  $\Delta hupA \Delta mutL$  and  $\Delta hupB \Delta mutL$  mutant strains. As shown in Figs. 3D, 3E, Additional file 1: Figs. S3D, S3E, Tables 1 and 2, although loss of *hupB* appeared to affect the BPS density pattern, the differences from the MMR<sup>-</sup> pattern were not significant. However, loss of *hupA* depressed mutation rates across the chromosome, particularly in the terminus region, while creating new peaks on either side of the Ter MD.

Fis has many binding sites across the chromosome, but, based on data at RegulonDB, SOBETZKO *et al.* (2012) (51) reported more Fis binding sites in the origin region. However both Chromatin immunoprecipitation plus microarray analysis (ChIP-chip) and ChIP-Seq studies found the density of Fis binding to be more-or-less constant across the chromosome (32, 52). Loss of Fis in both  $\Delta fis \Delta mutL$  and  $\Delta fis \Delta mutS$  mutant strains tended to flatten the BPS density pattern across the chromosome except in the region around the origin (Fig. 3F, Additional file 1: Figs. S3F, S5F, S6F, Tables 1 and 2).

The NAP HNS binds to DNA at its high-affinity binding sites and then spreads by oligomerization along A:T rich regions of DNA. Bridging between HNS-DNA complexes condenses the DNA into a few clusters per chromosome (53-55). However, as shown in Fig. 3G, Additional file 1: Fig. S3G, Tables 1 and 2), loss of HNS had little effect on the BPS density pattern, and, thus, the long-range structures produced by HNS appear not to affect BPS rates.

The DPS protein accumulates in stationary phase cells, condenses the nucleoid into a crystalline-like state, and protects the DNA from oxidative and other damage (56). Despite this radical physical change, loss of DPS had little effect on the BPS density pattern Fig. 3H, Additional file 1: Fig. S3H, Tables 1 and 2). Of course, we do not know the degree to which cells in stationary phase contribute to the BPS rates under our experimental conditions.

### **Proofreading**

As mentioned above, epsilon is the proofreading subunit of the DNA polymerase III holoenzyme. The *mutD5* allele encodes an epsilon protein that is inactive for proofreading, and strains carrying this allele have a mutation rate 4000-fold greater than that of wild-type strains, and 35-fold greater than that of MMR-defective strains (10). As shown in Fig. 4A, Additional file 1: Fig. S4A, Tables 1 and 2, when proofreading was inactive but MMR was active, the BPS density pattern was less dramatic than when MMR was inactive and proofreading was active; but, nonetheless, the wave pattern was basically the same. When both MMR and proofreading were inactive, which reveals the mutations solely due to replication errors, the BPS density pattern was nearly flat but around the origin it retained significant correlations to the patterns of both the MMR-defective and *mutD5* mutant strains (Fig. 4B, Additional file 1: Fig. S4B, Tables 1 and 2). Thus, the pattern of BPS on both sides of the origin appears to be

established by replication errors and then elsewhere across the chromosome the density pattern is largely due to differential error-correction by both proofreading and MMR.

# **Wild-type**

The mutational density wave patterns evident in our data, and in data from other bacteria (2, 3), were obtained when MMR was inactive. Thus, the question arises: does the pattern appear in wild-type strains? It is difficult to answer this question because mutation rates in wild-type strains are so low (in *E. coli*, 120-fold lower than that of MMR-defective strains (7, 11) that enormous experiments would have to be conducted in order to accumulate enough mutations to approach statistical confidence. In a recent study we compared the mutation rates and spectra of a number of *E. coli* strains defective in various DNA repair activities; of these, the results from seven strains were indistinguishable from those of the wild-type parent (57). By combining the mutations from these strains, we achieved 1933 BPSs (11), enough to expect to see a wave pattern if it existed. As is evident in Figs. 4C, 4D, Additional file 1: Figs. S4C, S4D, Tables 1 and 2, these BPSs did not create fall into a recognizable pattern. Indeed, the pattern from the wild-type strains appears to be random; the variance to mean ratio of the binned mutations is 1.4, indicating the values are not disperse, and the MatLab “runstest”, a test for runs, returns a P value of 0.58, also indicating that the bin values are random. In the wild-type strain both MMR and proofreading are active, and, while these two activities have similar correction biases (Fig. 4A), proofreading is much more powerful, producing the pattern seen in the MMR-defective strains. Although we cannot conclude that the mutational density pattern in the wild-type strain is other than random, it does have similarity to both the patterns seen in the MMR-defective strains and in the *mutD5* mutant strain, particularly around the terminus (Figs. 4C, 4D, Additional file 1: Figs. S4C, S4D and Tables 1 and 2).



## 348 ***Bacillus subtilis***

349 In additional to *E. coli* strains, symmetrical mutational density patterns have been demonstrated  
 350 in MMR- derivatives of *Vibrio fischeri*, *V. cholera* (2-4), *Pseudomonas fluorescens* (5), and *P. aeruginosa*  
 351 (6). Here we add *Bacillus subtilis* to this list. As shown in Fig. 4E, Additional file 1: Fig. S4E, Tables 1 and  
 352 2, the BPS mutation rates in a *B. subtilis* *mutS::Tn10* mutant strain fell into a wave like pattern that was  
 353 symmetrical about the origin. Although similar in shape, the pattern was significantly different from  
 354 that of *E. coli* (Fig. 4E, Additional file 1: Fig. S4F, Tables 1 and 2). However, as in *E. coli*, the BPS rate  
 355 appeared to increase in the terminus region, which in *B. subtilis* is not 180° from the origin and  
 356 corresponds to bins 20-24 in Fig. 4E.

## 357 **Discussion**

358 In this report we have examined a number of factors that could be responsible for establishment  
 359 and maintenance of the symmetrical wave-like BPS density pattern across the chromosome. In broad  
 360 terms these factors were: transcription; DNA replication initiation, progression, and termination;  
 361 recombination and the SOS response to DNA damage; the binding of nucleoid-associated proteins;  
 362 and, error-correction by MMR and proofreading. As discussed above, we found that transcription and  
 363 the SOS response had little effect, and the effect of recombination was modest and confined to the  
 364 terminal region. We discuss the more significant, factors in greater detail here.

## 365 **DNA replication initiation, progression, and termination**

366 Providing additional replication origins, either by eliminating RNase H1 or by inserting an ectopic  
 367 *oriC* (*oriZ*), did not disrupt the wave (Fig. 1C and 1D). However, when *oriZ* was the only origin of  
 368 replication, the region of depressed BPS rate that surrounds *oriC* when it is in the normal position was  
 369 re-established about the new origin (Fig. 1E). Note that only 5.1 Kb of DNA containing *oriC* was

relocated (19), whereas the region of reduced mutation rate is about 200 Kb; thus, the mutation rate is not determined just by the DNA sequence surrounding the origin. We hypothesize that the process of replication initiation protects the DNA from damage and/or newly established replication forks have a low error-rate. In addition, the BPS mutation rate was increased for about 1000 Kb (10 bins) on either side the new origin so that it resembled the same region about the normal origin. The size of this area is close to the same size detected as “interacting zones” around *oriZ* (58). However, the mutational density pattern across the rest of the chromosome did not re-establish itself to be symmetrical about *oriZ*, but remained symmetrical about the absent *oriC*. Thus, other factors must be important at distant regions. We can also conclude that the overall structure of the BPS pattern across the chromosome is not determined by active replication initiation *per se*, but may have evolved in response to replication initiation.

Both *V. fischeri* and *V. cholera* have multiple circular chromosomes of different sizes; by comparing the mutational density patterns of these chromosomes, Dillon et al, 2018 (2) identified the timing of replication as a significant determinant of the mutational density patterns. As mentioned above, they suggested that the pattern could be the result of variations in the levels of dNTPs as origins fire during rapid growth. Our results provide partial support for this hypothesis, but also indicate that growth on rich medium, not growth rate *per se*, is a significant determinant of the mutational density pattern, possibly because of effects on the expression and DNA binding of HU and Fis (see below). Our results with a  $\Delta nrdR$  mutant strain (Fig. 2E) also show that dNTP levels are important, but, again, other factors are driving the overall wave pattern. In addition, the results with the  $\Delta rep$  mutant strain (Fig. 2F) indicate that radically interrupting the progression of the replication fork disrupts the mutational density pattern.

After declining to a local minimum about 3/5<sup>th</sup> of the distance along each replicore, mutation rates rise in the terminus region (Fig. 1A). We originally hypothesized that this increase was due to collisions of the replication complexes with the Tus anti-helicase, most of which would take place in the region between bins 18 and 31 (1). However, elimination of Tus had no effect on the wave pattern (Fig. 2G, Additional file 1: Fig. S2G), refuting this hypothesis. But, eliminating MatP, the protein that maintains the structure of the Ter MD, reduced mutation rates in the Ter MD, suggesting that replication of highly structured DNA is error-prone (Fig. 2H, Additional file 1: Fig. S2H). Interestingly, in  $\Delta matP$  mutant cells mutation rates increased in the Right and Left MCs, suggesting that in the absence of MatP, these adjacent regions of DNA gained structure. The mechanism by which MatP structures the Ter MC is not clear (59, 60), but it probably involves supercoils which, when unconstrained, could migrate into adjacent areas. However, two studies have found that loss of MatP increases the mobility and long-range interactions of adjacent DNA (41, 61). Resolution of these conflicts will require further experimentation.

#### *Nucleoid-associated proteins*

Our previous results predicted that the NAPs HU and Fis should play a role in establishing or maintaining the wave-pattern of BPS, but HNS should not (1). The results presented here confirmed that prediction. In addition, we also found that Dps had no effect on the BPS density pattern. Because the NAPs affect gene expression in various ways, we cannot conclude that DNA binding by the NAPs themselves is responsible for the mutational pattern. And, indeed, we found no significant positive correlations between the BPS pattern and published binding sites of the NAPs, although the location of the binding sites themselves vary widely among published results (e.g. see (32, 50) and the data in

RegulonDB (62). Nonetheless, we favor the hypothesis that structuring of the DNA by the NAPs, directly or indirectly, contributes to the BPS pattern.

The local effect of HU binding is to bend the DNA, but dimer-dimer interactions produce higher-order HU-DNA complexes that can constrain negative supercoils (63, 64). The analysis of the effect of HU on the mutational density pattern is also complicated by the variation in the cellular concentrations of the three forms with growth cycle (30). Although the two subunits can compensate for each other for viability, the affinities of three forms of HU for various DNA structures (linear, nicked, and gapped) differ (65). Both HU $\alpha_2$  and HU $\alpha\beta$  can constrain supercoils, but HU $\beta_2$  apparently cannot, at least *in vitro* (30). Since HU $\beta$  is not stable (66), the phenotype of a  $\Delta hupA$  mutant strain may simply be that of low cellular HU concentration.

While loss of HU $\beta$  had little effect on the mutational density pattern (Fig. 3D, Additional file 1: Fig. S3D), loss of HU $\alpha$  reduced the overall BPS rate by 33% and also changed the pattern (Fig. 3E, Additional file 1: Fig. S3E). In the  $\Delta hupA \Delta mutL$  mutant strain, mutation rates were low in the terminus region but elevated in the Right and Left MCs, very similar to the pattern seen in the  $\Delta matP \Delta mutL$  mutant strain (Fig. 2H). The low mutation rate in the Ter MD corresponds well with the density of genes activated in wild-type cells but not in HU-deleted cells (67). HU regulates transcription by modifying the DNA superhelical density, suggesting that, like MatP, HU increases the structure of the DNA in the terminal region, causing DNA replication to become error-prone.

The mutational pattern in the  $\Delta hupA \Delta mutL$  mutant strain is also similar to that of the  $\Delta recA \Delta mutL$  strain (Fig. 3A). An mutation accumulation experiment with a  $\Delta hupA \Delta recA \Delta mutL$  mutant strain resulted in a pattern similar to both single mutant strains, and so was not informative (data not shown).

Fis is a major transcriptional regulator, either activating or repressing, directly or indirectly, nearly a thousand genes (52). At some promoters Fis acts as a classic transcriptional regulator by interacting with RNA polymerase, but at other promoters Fis affects gene expression by altering the DNA superhelical density (68). The Fis DNA binding sequence is degenerate and the estimated number of binding sites identified by sequence analysis across the genome varies widely among studies. The results of ChIP analyses also vary: the number of DNA regions associated with Fis in different studies ranges from 200 to 1500, which may reflect the effects of different growth conditions (32, 52, 69).

The loss of Fis nearly doubled the overall BPS rate, but flattened the wave pattern outside of the origin region (Fig. 3F, Additional file 1: Figs. S5F, S6F). As mentioned above, the mutational density pattern MMR<sup>-</sup> strains is correlated to the density of genes activated in a  $\Delta fis$  mutant strain as reported by Blot *et al*, 2006 (70). This correlation is particularly strong in bins 14 to 33 ( $\rho = 0.62$ ,  $P = 0.003$ ), which corresponds to the area flattened in the  $\Delta fis \Delta mutL$  and  $\Delta fis \Delta mutS$  mutant strains. However, no correlation exists between our mutational data and genes found to be responsive to Fis in a recent study (32). Clearly more studies are needed to resolve these conflicts.

#### *Error-correction*

Assuming that the BPS recovered from the *mutD5*  $\Delta mutL$  mutant strain are due to intrinsic errors made by DNA polymerase, we conclude that the polymerase is accurate close to the origin, then becomes increasingly less accurate as replication proceeds to about 1/3 of the replicore, at which point accuracy increases again (Fig. 4B). The mutational pattern in the MMR-defective strains must reflect the biased ability of proofreader to correct these polymerase errors. Thus, proofreading is effective close to the origin, but then declines for about 1/3 of the replicore, increases in the Right and Left MCs, but declines again in the terminus region (Figs. 1A, 4B). Mutations in the *mutD5* mutant

strain are due to the failure of MMR to correct the polymerase errors that survive in the absence of proofreading. Since the mutational pattern in the *mutD5* mutant strain mimics that of the MMR-defective strains (Fig. 4A, Additional file 1: Fig. S4A, Tables 1 and 2), error correction by MMR, although much less powerful, apparently has the same biases as error correction by proofreader.

Given the above considerations, we would expect the mutational density pattern in the wild-type parental strain to mimic that of the MMR-defective strains. However, the nearly 2000 BPS accumulated in eight strains with wild-type mutational phenotypes appear randomly distributed across the chromosome (Figs. 4C, 4D). One explanation for this discrepancy is that when both proofreading and MMR are active, the mutation rate is reduced to the point that other, weaker DNA repair and mutagenic activities obscure the underlying pattern. Although not significantly correlated, the wild-type BPS pattern is similar to the MMR<sup>-</sup> pattern, particularly around the terminus, supporting this hypothesis. Alternatively, although the eight strains that we combined to produce 2000 BPS have the same mutation rates, they may have different wave patterns that tend to negate each other and obscure the underlying wild-type pattern.

## Conclusions

By applying mutation accumulation followed by whole-genome sequencing to bacterial strains mutant in various activities we have determined that the most important factors determining the symmetrical pattern of BPS rates across the chromosome are: the initiation, progression, and termination of DNA replication, replication error-correction, and chromosome structure. Because of the conservation of these factors, our results should apply to most bacteria, and possibly eukaryotes, and imply that different regions of the genome evolve at different rates.

## Methods

## 479 **Bacterial Strains and Media**

480 The strains used in this study are listed in Additional file 2: Table S1 and the methods of their  
481 construction are in Additional file Materials and Methods. Standard media and antibiotics were used  
482 (see Additional file 3: Methods).

## 483 **Mutation accumulation experiments**

484 The complete MA procedure has been extensively described (7, 11, 57). Details are given in the  
485 Additional file 3: Methods

## 486 **Genomic DNA Preparation, Library construction, Sequencing, and Sequence Analysis**

487 Details are given in the Additional file 3: Methods.

## 488 **RNA sequencing**

489 The *E. coli* strain PFM144, which is PFM2  $\Delta mutL$  (11), was grown in LB and aliquots collected  
490 during lag (OD = 0.022), log (OD = 0.3), and stationary (OD = 1.5) phase. The number of cells collected  
491 was kept constant for each growth phase. Total RNA was extracted, DNA and rRNA were removed, and  
492 libraries constructed and sequenced as detailed in the Additional file 3: Methods. Three biological  
493 triplicates were prepared for each growth phase.

494 A complete analysis of the RNA-Seq results will be the subject of a subsequent report. For this report  
495 the numbers of RNA-Seq reads for each condition were first normalized to the number of reads  
496 mapped to the gene *holD*, which was determined by rtPCR to be expressed at the same level in all  
497 phases of growth. The means of the normalized RNA reads from the triplicates were then binned into  
498 the same bins used for the mutational analysis. A fourth-order Daubechies wavelet transform was  
499 performed on the binned RNA-Seq reads as described for the mutational data (1).

## 500 **Statistical Analysis**

501 To obtain the BPS density patterns, the numbers of BPSs were binned into 46 bins, each 100 Kb long, as  
 502 described (1). A fourth-order Daubechies wavelet transform was performed on the binned mutation  
 503 data as described (1). For presentation in the Figures, these results were converted into rates by  
 504 dividing the number of BPS by the appropriate number of generations. Pearson's product-moment  
 505 correlation coefficient,  $\rho$ , was used to evaluate the correlations between the binned BPS data (Table  
 506 1). Spearman's nonparametric correlation coefficient was also computed for a few data sets, but gave  
 507 similar results. To account for multiple comparisons, p values were adjusted using the Benjamini-  
 508 Hochberg method (71) with the false discovery rate set at 25%, implemented with the MatLab R2018a  
 509 "mafdr" command. Because comparisons using the data from the same strain are not independent,  
 510 this adjustment was made separately for each column in Tables 1 and 2.

511 To further compare the BPS density patterns between two data sets, wavelet coherence was calculated  
 512 and plotted using the MatLab R2018a "wcoherence" command. While the Daubechies wavelet  
 513 provides a good visual representation of the binned data, it is not continuous and thus not easily  
 514 adapted for wavelet coherence analysis. The MatLab program first converts the binned data to Morlet  
 515 wavelets and then computes the coherence between two of these wavelets. We chose to analyze the  
 516 data with wavelet coherence because it gives a measure of the correlation between the signals  
 517 (displayed as colors in the Figures) (72, 73). In addition, the MatLab wavelet coherence plot indicates,  
 518 as a dashed curve, the 'cone of influence' within which results are free of artifactual edge effects (72).

519 The relative phase-lag between the two signals is indicated by small arrows: arrows pointing right  
 520 indicate in-phase, arrows pointing left indicate 180° out-of-phase, and arrows pointing in other  
 521 directions indicate the various degrees in between. Because the MatLab program assumes a



frequency-time series, the X axis of the plot is cycles/sample and the Y axis is time; we converted these to bins/cycle (on an inverted scale) and bins, respectively.

## **Declarations**

**Ethics approval and consent to participate:** Not applicable

**Consent for publication:** Not applicable

## **Availability of data and material**

The sequences and SNPs reported in this paper have been deposited with the National Center for Biotechnology Information Sequence Read Archive <https://trace.ncbi.nlm.nih.gov/Traces/sra/> (accession no. in progress) and in the IUScholarWorks Repository ([hdl.handle.net/2022/20340](https://hdl.handle.net/2022/20340)).

Bacterial strains are available upon request

## **Competing interests**

The authors declare no competing interests

## **Funding**

This research was supported by US Army Research Office Multidisciplinary University Research Initiative (MURI) Award W911NF-09-1-0444 to P.L.F. and H.T., the National Institutes of Health T32 GM007757 to B.A.N., and the US Army Undergraduate Research Apprenticeship Program to J. H. and S. R

## **Authors' contributions**

B.A.N. and P.L.F. designed the research, analyzed the data, and wrote the paper. B.A.N executed the experiments. W.M., H.L., and H.T. performed the bioinformatic analyses. P.L.F. and H.T. supplied resources. All authors read and approved the final manuscript.

## Acknowledgements

We thank H. Bedwell-Ivers, C. Coplen, M. Durham, J. Eagan, N. Gruenhagen, J. A. Healy, N. Ivers, C. Klineman., H. Lee, E. Popodi, I. Rameses, S. Riffert, H. Rivera, D. Simon, K. Smith, J. Townes, L. Tran, and L. Whitson for technical help. Bacterial strains were kindly provided by R. Schaaper, R. Reyes-Lamothe, D. Kearns, M. Konkol, and The National BioResource Project at the (Japanese) National Institute of Genetics. We also thank S. E.Bell and X. Wang for technical help and discussions.

## References

1. Foster PL, Hanson AJ, Lee H, Popodi EM, Tang H. On the mutational topology of the bacterial genome. *G3 (Bethesda)*. 2013;3(3):399-407.
2. Dillon MM, Sung W, Lynch M, Cooper VS. Periodic variation of mutation rates in bacterial genomes associated with replication timing. *MBio*. 2018;9(4).
3. Dillon MM, Sung W, Sebra R, Lynch M, Cooper VS. Genome-wide biases in the rate and molecular spectrum of spontaneous mutations in *Vibrio cholerae* and *Vibrio fischeri*. *Mol Biol Evol*. 2017;34(1):93-109.
4. Wei W, Xiong L, Ye YN, Du MZ, Gao YZ, Zhang KY, et al. Mutation landscape of base substitutions, duplications, and deletions in the representative current cholera pandemic strain. *Genome Biol Evol*. 2018;10(8):2072-85.

- 560 5. Long H, Sung W, Miller SF, Ackerman MS, Doak TG, Lynch M. Mutation rate, spectrum, topology,  
561 and context-dependency in the DNA mismatch repair-deficient *Pseudomonas fluorescens* ATCC948.  
562 *Genome Biol Evol.* 2014;7(1):262-71.
- 563 6. Dettman JR, Sztepanacz JL, Kassen R. The properties of spontaneous mutations in the  
564 opportunistic pathogen *Pseudomonas aeruginosa*. *BMC Genomics.* 2016;17:27.
- 565 7. Lee H, Popodi E, Tang H, Foster PL. Rate and molecular spectrum of spontaneous mutations in  
566 the bacterium *Escherichia coli* as determined by whole-genome sequencing. *Proceedings of the*  
567 *National Academy of Sciences of the United States of America.* 2012;109(41):E2774-E83.
- 568 8. Marinus MG. DNA Mismatch Repair. *EcoSal Plus.* 2012; doi:10.1128/ecosalplus.7.2.5
- 569 9. Ganai RA, Johansson E. DNA replication-a matter of fidelity. *Mol Cell.* 2016;62(5):745-55.
- 570 10. Niccum BA, Lee H, MohammedIsmail W, Tang H, Foster PL. The spectrum of replication errors in  
571 the absence of error correction assayed across the whole genome of *Escherichia coli*. *Genetics.*  
572 2018;209(4):1043-54.
- 573 11. Foster PL, Niccum BA, Popodi E, Townes JP, Lee H, MohammedIsmail W, et al. Determinants of  
574 base-pair substitution patterns revealed by whole-genome sequencing of DNA mismatch repair  
575 defective *Escherichia coli*. *Genetics.* 2018;209(4):1029-42.
- 576 12. Valens M, Penaud S, Rossignol M, Cornet F, Boccard F. Macrodomain organization of the  
577 *Escherichia coli* chromosome. *EMBO J.* 2004;23(21):4330-41.
- 578 13. Jinks-Robertson S, Bhagwat AS. Transcription-associated mutagenesis. *Annu Rev Genet.*  
579 2014;48:341-59.
- 580 14. Rasouly A, Pani B, Nudler E. A magic spot in genome maintenance. *Trends Genet.* 2017;33(1):58-  
581 67.

- 582 15. Zhang X, Zhang X, Zhang X, Liao Y, Song L, Zhang Q, et al. Spatial vulnerabilities of the *Escherichia*  
583 *coli* genome to spontaneous mutations revealed with improved duplex sequencing. *Genetics*.  
584 2018;210(2):547-58.
- 585 16. Withey JH, Friedman DI. A salvage pathway for protein structures: tmRNA and trans-translation.  
586 *Annu Rev Microbiol*. 2003;57:101-23.
- 587 17. Kogoma T. Stable DNA replication: interplay between DNA replication, homologous  
588 recombination, and transcription. *Microbiol and Molec Biol Rev*. 1997;61:212-38.
- 589 18. Maduike NZ, Tehranchi AK, Wang JD, Kreuzer KN. Replication of the *Escherichia coli* chromosome  
590 in RNase HI-deficient cells: multiple initiation regions and fork dynamics. *Mol Microbiol*. 2014;91(1):39-  
591 56.
- 592 19. Wang X, Lesterlin C, Reyes-Lamothe R, Ball G, Sherratt DJ. Replication and segregation of an  
593 *Escherichia coli* chromosome with two replication origins. *Proceedings of the National Academy of*  
594 *Sciences of the United States of America*. 2011;108(26):E243-50.
- 595 20. Ivanova D, Taylor T, Smith SL, Dimude JU, Upton AL, Mehrjouy MM, et al. Shaping the landscape  
596 of the *Escherichia coli* chromosome: replication-transcription encounters in cells with an ectopic  
597 replication origin. *Nucleic Acids Res*. 2015;43(16):7865-77.
- 598 21. Waldminghaus T, Skarstad K. The *Escherichia coli* SeqA protein. *Plasmid*. 2009;61(3):141-50.
- 599 22. Sutera VA, Jr., Lovett ST. The role of replication initiation control in promoting survival of  
600 replication fork damage. *Mol Microbiol*. 2006;60(1):229-39.
- 601 23. Sanchez-Romero MA, Busby SJ, Dyer NP, Ott S, Millard AD, Grainger DC. Dynamic distribution of  
602 SeqA protein across the chromosome of *Escherichia coli* K-12. *MBio*. 2010;1(1):e00012-10.

- 603 24. Weitao T, Nordstrom K, Dasgupta S. *Escherichia coli* cell cycle control genes affect chromosome  
604 superhelicity. EMBO Rep. 2000;1(6):494-9.
- 605 25. Lobner-Olesen A, Marinus MG, Hansen FG. Role of SeqA and Dam in *Escherichia coli* gene  
606 expression: a global/microarray analysis. Proceedings of the National Academy of Sciences of the  
607 United States of America. 2003;100(8):4672-7.
- 608 26. Waldminghaus T, Skarstad K. ChIP on Chip: surprising results are often artifacts. BMC Genomics.  
609 2010;11:414.
- 610 27. Sun L, Fuchs JA. *Escherichia coli* ribonucleotide reductase expression is cell cycle regulated. Mol  
611 Biol Cell. 1992;3(10):1095-105.
- 612 28. Gon S, Camara JE, Klungsoyr HK, Crooke E, Skarstad K, Beckwith J. A novel regulatory mechanism  
613 couples deoxyribonucleotide synthesis and DNA replication in *Escherichia coli*. EMBO J.  
614 2006;25(5):1137-47.
- 615 29. Cooper S, Helmstetter CE. Chromosome replication and the division cycle of *Escherichia coli* B/r. J  
616 Mol Biol. 1968;31(3):519-40.
- 617 30. Claret L, Rouviere-Yaniv J. Variation in HU composition during growth of *Escherichia coli*: the  
618 heterodimer is required for long term survival. J Mol Biol. 1997;273(1):93-104.
- 619 31. Dorman CJ. Function of nucleoid-associated proteins in chromosome structuring and  
620 transcriptional regulation. J Mol Microbiol Biotechnol. 2014;24(5-6):316-31.
- 621 32. Kahramanoglou C, Seshasayee AS, Prieto AI, Ibberson D, Schmidt S, Zimmermann J, et al. Direct  
622 and indirect effects of H-NS and Fis on global gene expression control in *Escherichia coli*. Nucleic Acids  
623 Res. 2011;39(6):2073-91.

- 624 33. Torrents E, Grinberg I, Gorovitz-Harris B, Lundstrom H, Borovok I, Aharonowitz Y, et al. NrdR  
625 controls differential expression of the *Escherichia coli* ribonucleotide reductase genes. J Bacteriol.  
626 2007;189(14):5012-21.
- 627 34. Lane HE, Denhardt DT. The rep mutation. IV. Slower movement of replication forks in *Escherichia*  
628 *coli* rep strains. J Mol Biol. 1975;97(1):99-112.
- 629 35. Guy CP, Atkinson J, Gupta MK, Mahdi AA, Gwynn EJ, Rudolph CJ, et al. Rep provides a second  
630 motor at the replisome to promote duplication of protein-bound DNA. Mol Cell. 2009;36(4):654-66.
- 631 36. Boubakri H, de Septenville AL, Viguera E, Michel B. The helicases DinG, Rep and UvrD cooperate  
632 to promote replication across transcription units in vivo. EMBO J. 2010;29(1):145-57.
- 633 37. Myka KK, Hawkins M, Syeda AH, Gupta MK, Meharg C, Dillingham MS, et al. Inhibiting translation  
634 elongation can aid genome duplication in *Escherichia coli*. Nucleic Acids Res. 2017;45(5):2571-84.
- 635 38. Heller RC, Mariani KJ. Non-replicative helicases at the replication fork. DNA Repair (Amst).  
636 2007;6(7):945-52.
- 637 39. Sandler SJ, Mariani KJ. Role of PriA in replication fork reactivation in *Escherichia coli*. J Bact.  
638 2000;182:9-13.
- 639 40. Duggin IG, Wake RG, Bell SD, Hill TM. The replication fork trap and termination of chromosome  
640 replication. MolMicrobiol. 2008;70(6):1323-33.
- 641 41. Mercier R, Petit MA, Schbath S, Robin S, El Karoui M, Boccard F, et al. The MatP/matS site-specific  
642 system organizes the terminus region of the *E. coli* chromosome into a macrodomain. Cell.  
643 2008;135(3):475-85.
- 644 42. Espeli O, Borne R, Dupaigne P, Thiel A, Gigant E, Mercier R, et al. A MatP-divisome interaction  
645 coordinates chromosome segregation with cell division in *E. coli*. EMBO J. 2012;31(14):3198-211.

- 646 43. Syeda AH, Hawkins M, McGlynn P. Recombination and replication. Cold Spring Harb Perspect  
647 Biol. 2014;6(11):a016550.
- 648 44. Louarn JM, Louarn J, Francois V, Patte J. Analysis and possible role of hyperrecombination in the  
649 termination region of the *Escherichia coli* chromosome. J Bacteriol. 1991;173(16):5097-104.
- 650 45. Bierne H, Ehrlich SD, Michel B. The replication termination signal *terB* of the *Escherichia coli*  
651 chromosome is a deletion hot spot. EMBO J. 1991;10(9):2699-705.
- 652 46. Louarn J, Cornet F, Francois V, Patte J, Louarn JM. Hyperrecombination in the terminus region of  
653 the *Escherichia coli* chromosome: possible relation to nucleoid organization. J Bacteriol.  
654 1994;176(24):7524-31.
- 655 47. Corre J, Cornet F, Patte J, Louarn JM. Unraveling a region-specific hyper-recombination  
656 phenomenon: genetic control and modalities of terminal recombination in *Escherichia coli*. Genetics.  
657 1997;147(3):979-89.
- 658 48. Cox MM. Regulation of bacterial RecA protein function. Crit Rev Biochem Mol Biol.  
659 2007;42(1):41-63.
- 660 49. Little JW, Harper JE. Identification of the *lexA* gene product of *Escherichia coli* K-12. Proceedings  
661 of the National Academy of Sciences of the United States of America. 1979;76(12):6147-51.
- 662 50. Prieto AI, Kahramanoglou C, Ali RM, Fraser GM, Seshasayee AS, Luscombe NM. Genomic analysis  
663 of DNA binding and gene regulation by homologous nucleoid-associated proteins IHF and HU in  
664 *Escherichia coli* K12. Nucleic Acids Res. 2012;40(8):3524-37.
- 665 51. Sobetzko P, Travers A, Muskhelishvili G. Gene order and chromosome dynamics coordinate  
666 spatiotemporal gene expression during the bacterial growth cycle. Proc Natl Acad Sci USA.  
667 2012;109(2):E42-E50.

- 668 52. Cho BK, Knight EM, Barrett CL, Palsson BO. Genome-wide analysis of Fis binding in *Escherichia*  
669 *coli* indicates a causative role for A-/AT-tracts. *Genome Res.* 2008;18(6):900-10.
- 670 53. Wang W, Li GW, Chen C, Xie XS, Zhuang X. Chromosome organization by a nucleoid-associated  
671 protein in live bacteria. *Science.* 2011;333(6048):1445-9.
- 672 54. Lang B, Blot N, Bouffartigues E, Buckle M, Geertz M, Gualerzi CO, et al. High-affinity DNA binding  
673 sites for H-NS provide a molecular basis for selective silencing within proteobacterial genomes. *Nucleic*  
674 *Acids Res.* 2007;35(18):6330-7.
- 675 55. Bouffartigues E, Buckle M, Badaut C, Travers A, Rimsky S. H-NS cooperative binding to high-  
676 affinity sites in a regulatory element results in transcriptional silencing. *Nat Struct Mol Biol.*  
677 2007;14(5):441-8.
- 678 56. Wolf SG, Frenkiel D, Arad T, Finkel SE, Kolter R, Minsky A. DNA protection by stress-induced  
679 biocrystallization. *Nature.* 1999;400(6739):83-5.
- 680 57. Foster PL, Lee H, Popodi E, Townes JP, Tang H. Determinants of spontaneous mutation in the  
681 bacterium *Escherichia coli* as revealed by whole-genome sequencing. *Proceedings of the National*  
682 *Academy of Sciences of the United States of America.* 2015;112(44):E5990-E599.
- 683 58. Duigou S, Boccard F. Long range chromosome organization in *Escherichia coli*: The position of the  
684 replication origin defines the non-structured regions and the Right and Left macrodomains. *PLoS*  
685 *Genet.* 2017;13(5):e1006758.
- 686 59. Dupaigne P, Tonthat NK, Espeli O, Whitfill T, Boccard F, Schumacher MA. Molecular basis for a  
687 protein-mediated DNA-bridging mechanism that functions in condensation of the *E. coli* chromosome.  
688 *Mol Cell.* 2012;48(4):560-71.



- 689 60. Lioy VS, Cournac A, Marbouty M, Duigou S, Mozziconacci J, Espeli O, et al. Multiscale structuring  
690 of the *E. coli* chromosome by nucleoid-associated and condensin proteins. *Cell*. 2018;172(4):771-83  
691 e18.
- 692 61. Thiel A, Valens M, Vallet-Gely I, Espeli O, Boccard F. Long-range chromosome organization in *E.*  
693 *coli*: a site-specific system isolates the Ter macrodomain. *PLoS Genet*. 2012;8(4):e1002672.
- 694 62. Salgado H, Peralta-Gil M, Gama-Castro S, Santos-Zavaleta A, Muniz-Rascado L, Garcia-Sotelo JS, et  
695 al. RegulonDB v8.0: omics data sets, evolutionary conservation, regulatory phrases, cross-validated  
696 gold standards and more. *Nucleic Acids Res*. 2013;41(Database issue):D203-13.
- 697 63. Guo F, Adhya S. Spiral structure of *Escherichia coli* HUalpha-beta provides foundation for DNA  
698 supercoiling. *Proceedings of the National Academy of Sciences of the United States of America*.  
699 2007;104(11):4309-14.
- 700 64. van Noort J, Verbrugge S, Goosen N, Dekker C, Dame RT. Dual architectural roles of HU:  
701 formation of flexible hinges and rigid filaments. *Proceedings of the National Academy of Sciences of*  
702 *the United States of America*. 2004;101(18):6969-74.
- 703 65. Pinson V, Takahashi M, Rouviere-Yaniv J. Differential binding of the *Escherichia coli* HU,  
704 homodimeric forms and heterodimeric form to linear, gapped and cruciform DNA. *J Mol Biol*.  
705 1999;287(3):485-97.
- 706 66. Bonnefoy E, Almeida A, Rouviere-Yaniv J. Lon-dependent regulation of the DNA binding protein  
707 HU in *Escherichia coli*. *Proceedings of the National Academy of Sciences of the United States of*  
708 *America*. 1989;86(20):7691-5.

67. Berger M, Farcas A, Geertz M, Zhelyazkova P, Brix K, Travers A, et al. Coordination of genomic structure and transcription by the main bacterial nucleoid-associated protein HU. EMBO Rep. 2010;11(1):59-64.
68. Browning DF, Grainger DC, Busby SJ. Effects of nucleoid-associated proteins on bacterial chromosome structure and gene expression. Curr Opin Microbiol. 2010;13(6):773-80.
69. Grainger DC, Hurd D, Goldberg MD, Busby SJ. Association of nucleoid proteins with coding and non-coding segments of the *Escherichia coli* genome. Nucleic Acids Res. 2006;34(16):4642-52.
70. Blot N, Mavathur R, Geertz M, Travers A, Muskhelishvili G. Homeostatic regulation of supercoiling sensitivity coordinates transcription of the bacterial genome. EMBO Rep. 2006;7(7):710-5.
71. Benjamini Y, Hochberg Y. Controlling the false discovery rate - a practical and powerful approach to multiple testing. J Roy Stat Soc Ser B (Stat Method). 1995;57(1):289-300.
72. Grinsted A, Moore JC, Jevrejeva S. Application of the cross wavelet transform and wavelet coherence to geophysical time series. Nonlinear Processes in Geophysics. 2004;11:561-6.
73. Maraun D, Kurths J. Cross wavelet analysis: significance testing and pitfalls. Nonlinear Processes in Geophysics. 2004;11:505-14.

**Table 1. Pearson's correlation,  $\rho$ , of each strain versus MMR<sup>-</sup>**

| Strain                  | Description                                    | Whole        |                |                  |                |                 |                |                        |                |               |                |
|-------------------------|------------------------------------------------|--------------|----------------|------------------|----------------|-----------------|----------------|------------------------|----------------|---------------|----------------|
|                         |                                                | Chromosome   |                | Right Replichore |                | Left Replichore |                | Origin                 |                | Terminus      |                |
|                         |                                                | Bins 1 to 46 |                | Bins 1 to 23     |                | Bins 46 to 24   |                | Bins 1 to 13, 46 to 34 |                | Bins 14 to 33 |                |
|                         |                                                | $\rho$       | P <sup>a</sup> | $\rho$           | P <sup>a</sup> | $\rho$          | P <sup>a</sup> | $\rho$                 | P <sup>a</sup> | $\rho$        | P <sup>a</sup> |
| Collective <sup>b</sup> | MMR <sup>-</sup>                               | —            | —              | —                | —              | —               | —              | —                      | —              | —             | —              |
| Collective              | MMR <sup>-</sup> minus A:T ts at               |              |                |                  |                |                 |                |                        |                |               |                |
|                         | NAC/NTG                                        | 0.94         | <0.001         | 0.93             | <0.001         | 0.96            | <0.001         | 0.97                   | <0.001         | 0.71          | 0.004          |
| PFM421                  | <i>ΔrnhA ΔmutL</i>                             | 0.74         | <0.001         | 0.63             | 0.002          | 0.84            | <0.001         | 0.81                   | <0.001         | 0.47          | 0.075          |
| PFM669                  | <i>ΔmutL</i> (AB1157)                          | 0.59         | <0.001         | 0.40             | 0.064          | 0.75            | <0.001         | 0.71                   | <0.001         | 0.45          | 0.079          |
| PFM430/ 431             | <i>oriC<sup>+</sup> oriZ<sup>+</sup> ΔmutL</i> |              |                |                  |                |                 |                |                        |                |               |                |
|                         | (AB1157)                                       | 0.75         | <0.001         | 0.71             | <0.001         | 0.81            | <0.001         | 0.83                   | <0.001         | 0.46          | 0.075          |
| PFM426                  | <i>ΔoriC oriZ<sup>+</sup> ΔmutL</i>            |              |                |                  |                |                 |                |                        |                |               |                |
|                         | (AB1157)                                       | 0.39         | 0.008          | 0.21             | 0.34           | 0.62            | 0.003          | 0.40                   | 0.044          | 0.41          | 0.11           |
| PFM533/ 534             | <i>ΔseqA ΔmutL</i>                             | 0.49         | 0.001          | 0.71             | <0.001         | 0.27            | 0.23           | 0.53                   | 0.006          | 0.38          | 0.14           |
| PFM5 <sup>b</sup>       | <i>ΔmutL</i> on minimal                        |              |                |                  |                |                 |                |                        |                |               |                |
|                         | medium                                         | 0.50         | 0.001          | 0.40             | 0.069          | 0.61            | 0.003          | 0.57                   | 0.003          | 0.58          | 0.029          |

|                     |                              |      |        |      |        |      |        |      |        |       |       |
|---------------------|------------------------------|------|--------|------|--------|------|--------|------|--------|-------|-------|
| PFM343 <sup>b</sup> | <i>ΔmutS</i> on minimal      |      |        |      |        |      |        |      |        |       |       |
|                     | medium                       | 0.18 | 0.22   | 0.18 | 0.41   | 0.18 | 0.41   | 0.21 | 0.31   | 0.22  | 0.38  |
| PFM343 <sup>b</sup> | <i>ΔmutS</i> on diluted LB   | 0.84 | <0.001 | 0.84 | <0.001 | 0.85 | <0.001 | 0.87 | <0.001 | 0.71  | 0.004 |
| PFM343 <sup>b</sup> | <i>ΔmutS</i> on supplemented |      |        |      |        |      |        |      |        |       |       |
|                     | minimal medium               | 0.81 | <0.001 | 0.82 | <0.001 | 0.81 | <0.001 | 0.83 | <0.001 | 0.65  | 0.008 |
| PFM342 <sup>b</sup> | <i>ΔmutS</i> at low          |      |        |      |        |      |        |      |        |       |       |
|                     | temperature                  | 0.57 | <0.001 | 0.60 | 0.003  | 0.53 | 0.013  | 0.69 | <0.001 | -0.02 | 0.95  |
| PFM799              | <i>ΔnrdR ΔmutL</i>           | 0.49 | 0.001  | 0.58 | 0.005  | 0.39 | 0.080  | 0.69 | <0.001 | -0.31 | 0.24  |
| PFM677              | <i>Δrep ΔmutL</i>            | 0.48 | 0.001  | 0.49 | 0.022  | 0.48 | 0.027  | 0.62 | 0.001  | -0.12 | 0.67  |
| PFM256              | <i>Δtus ΔmutL</i>            | 0.82 | <0.001 | 0.79 | <0.001 | 0.85 | <0.001 | 0.87 | <0.001 | 0.70  | 0.004 |
| PFM257              | <i>ΔmatP ΔmutL</i>           | 0.40 | 0.007  | 0.60 | 0.004  | 0.21 | 0.34   | 0.70 | <0.001 | -0.47 | 0.075 |
| PFM422              | <i>ΔrecA ΔmutL</i>           | 0.71 | <0.001 | 0.70 | <0.001 | 0.73 | <0.001 | 0.85 | <0.001 | 0.06  | 0.84  |
| PFM424              | <i>ΔrecA ΔmutS</i>           | 0.80 | <0.001 | 0.78 | <0.001 | 0.83 | <0.001 | 0.91 | <0.001 | 0.44  | 0.082 |
| PFM456              | <i>ΔrecB ΔmutL</i>           | 0.82 | <0.001 | 0.87 | <0.001 | 0.79 | <0.001 | 0.89 | <0.001 | 0.39  | 0.12  |
| PFM118              | <i>ΔumuDC ΔdinB ΔmutL</i>    | 0.59 | <0.001 | 0.62 | 0.003  | 0.55 | 0.010  | 0.61 | 0.001  | 0.69  | 0.004 |
| PFM120              | <i>lexA3 ΔsulA ΔmutL</i>     | 0.82 | <0.001 | 0.82 | <0.001 | 0.83 | <0.001 | 0.83 | <0.001 | 0.80  | 0.001 |
| PFM259              | <i>ΔhupB ΔmutL</i>           | 0.73 | <0.001 | 0.70 | <0.001 | 0.77 | <0.001 | 0.81 | <0.001 | 0.57  | 0.031 |
| PFM258              | <i>ΔhupA ΔmutL</i>           | 0.49 | 0.001  | 0.43 | 0.053  | 0.58 | 0.005  | 0.67 | <0.001 | -0.23 | 0.38  |
| PFM317/ 318         | <i>Δfis ΔmutL</i>            | 0.51 | <0.001 | 0.61 | 0.003  | 0.42 | 0.060  | 0.67 | <0.001 | -0.30 | 0.25  |
| PFM482              | <i>Δfis ΔmutS</i>            | 0.49 | 0.001  | 0.31 | 0.15   | 0.62 | 0.003  | 0.65 | <0.001 | -0.28 | 0.27  |

|                             |                          |      |        |      |        |      |        |      |        |       |       |
|-----------------------------|--------------------------|------|--------|------|--------|------|--------|------|--------|-------|-------|
| PFM741                      | <i>Δhns ΔmutL</i>        | 0.81 | <0.001 | 0.81 | <0.001 | 0.81 | <0.001 | 0.88 | <0.001 | 0.46  | 0.075 |
| PFM713                      | <i>Δdps ΔmutL</i>        | 0.80 | <0.001 | 0.84 | <0.001 | 0.78 | <0.001 | 0.89 | <0.001 | 0.47  | 0.075 |
| PFM163 <sup>c</sup>         | <i>mutD5</i>             | 0.76 | <0.001 | 0.79 | <0.001 | 0.74 | <0.001 | 0.82 | <0.001 | 0.78  | 0.001 |
| PFM165/397/399 <sup>c</sup> | <i>mutD5 ΔmutL</i>       | 0.64 | <0.001 | 0.76 | <0.001 | 0.52 | 0.014  | 0.86 | <0.001 | -0.46 | 0.075 |
| Collective <sup>b</sup>     | Wild type                | 0.36 | 0.014  | 0.41 | 0.061  | 0.31 | 0.17   | 0.37 | 0.065  | 0.51  | 0.060 |
| Collective <sup>d</sup>     | <i>Bacillus subtilis</i> |      |        |      |        |      |        |      |        |       |       |
|                             | <i>mutS::Tn10</i>        | 0.52 | <0.001 | 0.63 | 0.003  | 0.40 | 0.068  | 0.74 | <0.001 | -0.52 | 0.055 |

<sup>a</sup> P values were adjusted for multiple comparisons using the Benjamini-Hochberg method (71) with the false discovery rate set at 25%

<sup>b</sup> Data are from (11)

<sup>c</sup> Data are from (10)

<sup>d</sup> Data are combined from four MA experiments with DK2140 (NCIB3610 *mutS::Tn10*), DK2141 (NCIB3610 *mutS::Tn10*), DK2142 (NCIB3610 *mutS::Tn10 ΔcomI*), and DK2143 (NCIB3610 *mutS::Tn10 ΔcomI*). There were no differences in mutation rates or spectra among these strain

**Table 2. Pearson's correlation,  $\rho$ , of right versus left replichore for each strain**

| Strain                  | Description                                                              | Whole Chromosome       |                | Origin                 |                | Terminus                |                |
|-------------------------|--------------------------------------------------------------------------|------------------------|----------------|------------------------|----------------|-------------------------|----------------|
|                         |                                                                          | Bins 1 to 23, 46 to 24 |                | Bins 1 to 13, 46 to 34 |                | Bins 14 to 23, 33 to 24 |                |
|                         |                                                                          | $\rho$                 | P <sup>a</sup> | $\rho$                 | P <sup>a</sup> | $\rho$                  | P <sup>a</sup> |
| Collective <sup>b</sup> | MMR <sup>-</sup>                                                         | 0.91                   | <0.001         | 0.95                   | <0.001         | 0.66                    | 0.23           |
| Collective              | MMR <sup>-</sup> minus A:T ts at NAC/NTG                                 | 0.89                   | <0.001         | 0.94                   | <0.001         | 0.42                    | 0.60           |
| PFM421                  | $\Delta rnhA \Delta mutL$                                                | 0.49                   | 0.026          | 0.58                   | 0.051          | 0.24                    | 0.82           |
| PFM669                  | $\Delta mutL$ (AB1157)                                                   | 0.52                   | 0.018          | 0.64                   | 0.026          | 0.29                    | 0.77           |
| PFM430/ 431             | <i>oriC</i> <sup>+</sup> <i>oriZ</i> <sup>+</sup> $\Delta mutL$ (AB1157) | 0.60                   | 0.005          | 0.80                   | 0.003          | 0.19                    | 0.84           |
| PFM426                  | $\Delta oriC$ <i>oriZ</i> <sup>+</sup> $\Delta mutL$ (AB1157)            | 0.28                   | 0.22           | 0.33                   | 0.31           | -0.06                   | 0.91           |
| PFM533/ 534             | $\Delta seqA \Delta mutL$                                                | 0.41                   | 0.062          | 0.53                   | 0.079          | 0.32                    | 0.71           |
| PFM5 <sup>b</sup>       | $\Delta mutL$ on minimal medium                                          | 0.27                   | 0.22           | 0.19                   | 0.53           | 0.05                    | 0.91           |
| PFM343 <sup>b</sup>     | $\Delta mutS$ on minimal medium                                          | -0.02                  | 0.93           | 0.32                   | 0.31           | -0.53                   | 0.39           |
| PFM343 <sup>b</sup>     | $\Delta mutS$ on diluted LB                                              | 0.87                   | <0.001         | 0.93                   | <0.001         | 0.66                    | 0.23           |
| PFM343 <sup>b</sup>     | $\Delta mutS$ on supplemented minimal medium                             | 0.74                   | <0.001         | 0.79                   | 0.003          | 0.54                    | 0.39           |
| PFM342 <sup>b</sup>     | $\Delta mutS$ at low temperature                                         | 0.84                   | <0.001         | 0.89                   | <0.001         | 0.73                    | 0.19           |
| PFM799                  | $\Delta nrdR \Delta mutL$                                                | 0.79                   | <0.001         | 0.78                   | 0.003          | 0.84                    | 0.07           |
| PFM677                  | $\Delta rep \Delta mutL$                                                 | 0.43                   | 0.053          | 0.58                   | 0.051          | -0.16                   | 0.84           |
| PFM256                  | $\Delta tus \Delta mutL$                                                 | 0.70                   | 0.001          | 0.88                   | <0.001         | 0.26                    | 0.81           |
| PFM257                  | $\Delta matP \Delta mutL$                                                | 0.45                   | 0.042          | 0.40                   | 0.20           | 0.72                    | 0.19           |

|                             |                                     |      |        |      |        |       |      |
|-----------------------------|-------------------------------------|------|--------|------|--------|-------|------|
| PFM422                      | <i>ΔrecA ΔmutL</i>                  | 0.66 | 0.001  | 0.81 | 0.003  | 0.11  | 0.88 |
| PFM424                      | <i>ΔrecA ΔmutS</i>                  | 0.64 | 0.002  | 0.80 | 0.003  | 0.07  | 0.91 |
| PFM456                      | <i>ΔrecB ΔmutL</i>                  | 0.67 | 0.001  | 0.78 | 0.003  | 0.03  | 0.94 |
| PFM118                      | <i>ΔumuDC ΔdinB ΔmutL</i>           | 0.39 | 0.075  | 0.68 | 0.018  | -0.13 | 0.87 |
| PFM120                      | <i>lexA3 ΔsulA ΔmutL</i>            | 0.51 | 0.019  | 0.57 | 0.055  | 0.42  | 0.60 |
| PFM259                      | <i>ΔhupB ΔmutL</i>                  | 0.64 | 0.002  | 0.78 | 0.003  | 0.35  | 0.65 |
| PFM258                      | <i>ΔhupA ΔmutL</i>                  | 0.54 | 0.014  | 0.69 | 0.015  | 0.15  | 0.84 |
| PFM317/ 318                 | <i>Δfis ΔmutL</i>                   | 0.61 | 0.004  | 0.67 | 0.019  | 0.58  | 0.34 |
| PFM482                      | <i>Δfis ΔmutS</i>                   | 0.34 | 0.13   | 0.49 | 0.108  | 0.19  | 0.84 |
| PFM741                      | <i>Δhns ΔmutL</i>                   | 0.81 | <0.001 | 0.85 | 0.001  | 0.60  | 0.33 |
| PFM713                      | <i>Δdps ΔmutL</i>                   | 0.52 | 0.017  | 0.77 | 0.004  | -0.20 | 0.84 |
| PFM163 <sup>c</sup>         | <i>mutD5</i>                        | 0.75 | <0.001 | 0.77 | 0.004  | 0.52  | 0.39 |
| PFM165/397/399 <sup>c</sup> | <i>mutD5 ΔmutL</i>                  | 0.78 | <0.001 | 0.88 | <0.001 | 0.39  | 0.62 |
| Collective <sup>b</sup>     | Wild type                           | 0.17 | 0.46   | 0.24 | 0.45   | 0.17  | 0.84 |
| Collective <sup>d</sup>     | <i>Bacillus subtilis mutS::Tn10</i> | 0.73 | <0.001 | 0.87 | 0.000  | 0.37  | 0.65 |

---

<sup>a</sup> P values were adjusted for multiple comparisons using the Benjamini-Hochberg method (71) with the false discovery rate set at 25%

<sup>b</sup> Data are from (11)

<sup>c</sup> Data are from (10)

<sup>d</sup> Data are combined from four MA experiments with DK2140 (NCIB3610 *mutS*::Tn10), DK2141 (NCIB3610 *mutS*::Tn10), DK2142 (NCIB3610 *mutS*::Tn10  $\Delta comI$ ), and DK2143 (NCIB3610 *mutS*::Tn10  $\Delta comI$ ). There were no differences in mutation rates or spectra among these strain



# 1 **Figure Legends**

2 **Fig. 1.** The BPS density pattern is not due to transcription but is affected by moving the origin of  
3 replication. For each plot the data were collected into 100 Kb bins starting at the origin of  
4 replication on the left and continuing clockwise around the chromosome back to the origin on  
5 the right. **Fig. 1A.** The BPS density pattern of MMR-defective strains. Bars represent the mean  
6 mutation rate in each bin calculated from the BPSs collected from 10 experiments with MMR-  
7 defective strains. Error bars are the 95% CLs of the means. The grey line represents the  
8 Daubechies wavelet transform of the binned data. The chromosomal macrodomains (MCs) are  
9 indicated at the top of the plot: green, Ori MC; blue, Right and Left MC; red, Ter MC. **Fig. 1B.**  
10 The Daubechies wavelet transform of the binned reads from RNA-Seq samples taken during lag,  
11 log, and stationary growth phases of the  $\Delta mutL$  mutant strain, PFM144. The data used for the  
12 wavelet transforms were the means of three biological replicates. Arrows indicate the positions  
13 of the rRNA operons, but the reads from the ribosomal genes in those operons were not  
14 included in the plot. **Fig. 1C, D, E, and F.** The BPS density patterns (bars) and Daubechies  
15 wavelet transforms (pink line) of the indicated mutant strains compared to the Daubechies  
16 wavelet transform of the combined MMR<sup>-</sup> strains (grey line). See text for a description of the  
17 strains. In each plot the left-hand scale has been adjusted to bring the wavelets close together  
18 for comparison. The red arrow in 1E indicates the position of *oriZ*. Strains: 1C, PFM421; 1D,  
19 PFM430/431; 1E, PFM426; 1F, PFM533/534.

20 **Fig. 2.** Altering the progression of DNA replication affects the BPS density pattern. For each plot  
21 the data were collected into 100 Kb bins starting at the origin of replication on the left and  
22 continuing clockwise around the chromosome back to the origin on the right. The BPS density

patterns (bars) and Daubechies wavelet transforms (pink lines) of the indicated strains are compared to the Daubechies wavelet transform of the combined MMR<sup>-</sup> strains (grey line). In each plot the left-hand scale has been adjusted to bring the wavelets close together for comparison. **Fig. 2A, B, C, and D.** Altering the cellular growth rate by growing a  $\Delta mutS$  mutant strain on different medium and at different temperatures differentially affects the BPS density pattern. In the experiments shown in Plot A, C, and D, the cells grew at about half the normal rate, whereas in the experiment shown in plot B they grew at the normal rate. Strains: 2A, 2B, and 2C, PFM343; 2D, PFM342. **Fig. 2E and F.** Dysregulation of dNTP levels and loss of Rep, the auxiliary replication helicase, affect the BPS density pattern. 2E, PFM799; 2F, PFM677. **Fig. 2G and H.** Loss of the Tus antihelicase has no effect, but loss of the terminus organizing protein, MatP, changes the BPS density pattern across the chromosome. The arrows in Fig. 2G mark the major Ter sites where Tus binds. The bar in Fig. 2H shows the region in which MatP binds. Strains: 2G, PFM256; 2H, PFM257.

**Fig. 3.** Loss of RecA, HU $\alpha$ , or Fis changes the BPS pattern, but the SOS response and loss of other NAPs do not. For a description of the plots, see the legend to Fig. 2. **Fig. 3A, B, and C.** Loss of RecA alters the BPS density pattern in the terminus region, but not through its role as a master regulator of the SOS response. RecA (Fig. 3A) is *E. coli*'s major recombinase. The *dinB* and *umuDC* genes (Fig. 3B) encode the error-prone DNA polymerases, Pol IV and Pol V, that are induced as part of the SOS response. The *lexA3* allele encodes a non-inducible repressor of the SOS genes. Deletion of *suIA* prevents lethal filamentation after induction of the SOS response (not relevant to this study). Strains: 3A, PFM422; 3B, PFM118; 3C, PFM120. **Fig. 3D, E, F, G, and H.** Loss of the HU $\alpha$  subunit of HU or of Fis changes the BPS density pattern, but loss of the HU $\beta$

subunit of HU, HNS, or DPS has only minor effects. Strains: 3D, PFM259; 3E, PFM258; 3F, PFM317/318; 3G, PFM741/742; 3H, PFM713.

**Fig. 4.** The BPS density pattern is a result of biased correction by replication proofreading and MMR. For a description of the plots, see the legend to Fig. 2. **Fig. 4A and B.** A strain with deficient proofreading but active MMR yields a BPS pattern similar to a MMR-defective strain, but a strain with neither proofreading nor MMR does not. The *mutD5* allele encodes an exonuclease deficient proofreader. Strains: 4A, PFM163; 4B, PFM165/397/399. **Fig. 4C and D.** The BPS density pattern in the wild-type strain does not match the pattern of either the MMR-defective strain, or the *mutD5* mutant strain. The green line in Fig. 1D is the Daubechies wavelet transform of the *mutD5* mutant strain (pink line in Fig. 4A). Strains: 4C and D, eight strains with wild-type mutational phenotypes (see text). **Fig. 4E.** MMR-defective *B. subtilis* also has a symmetrical BPS density pattern, but it is different than *E. coli*'s pattern. Strains: three *B. subtilis* mutant strains with the same mutational phenotype (see Additional file 2: Tables S1 and S3).

Figure 1

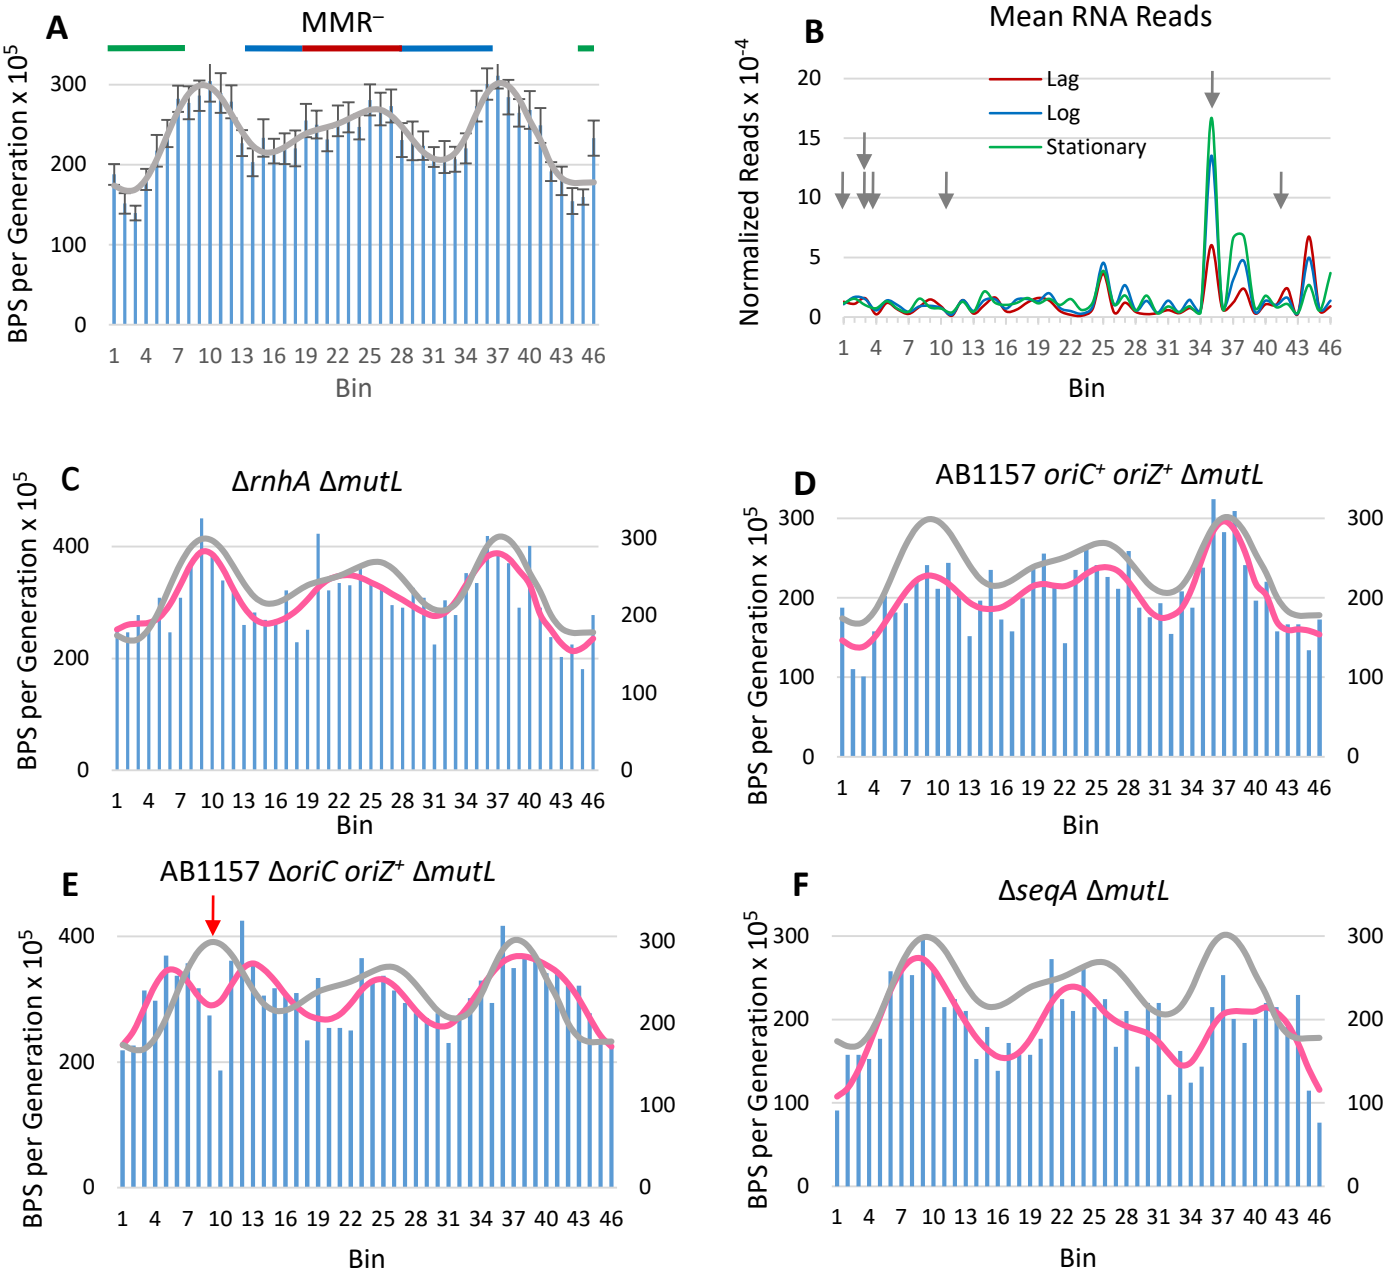

**Figure 2**

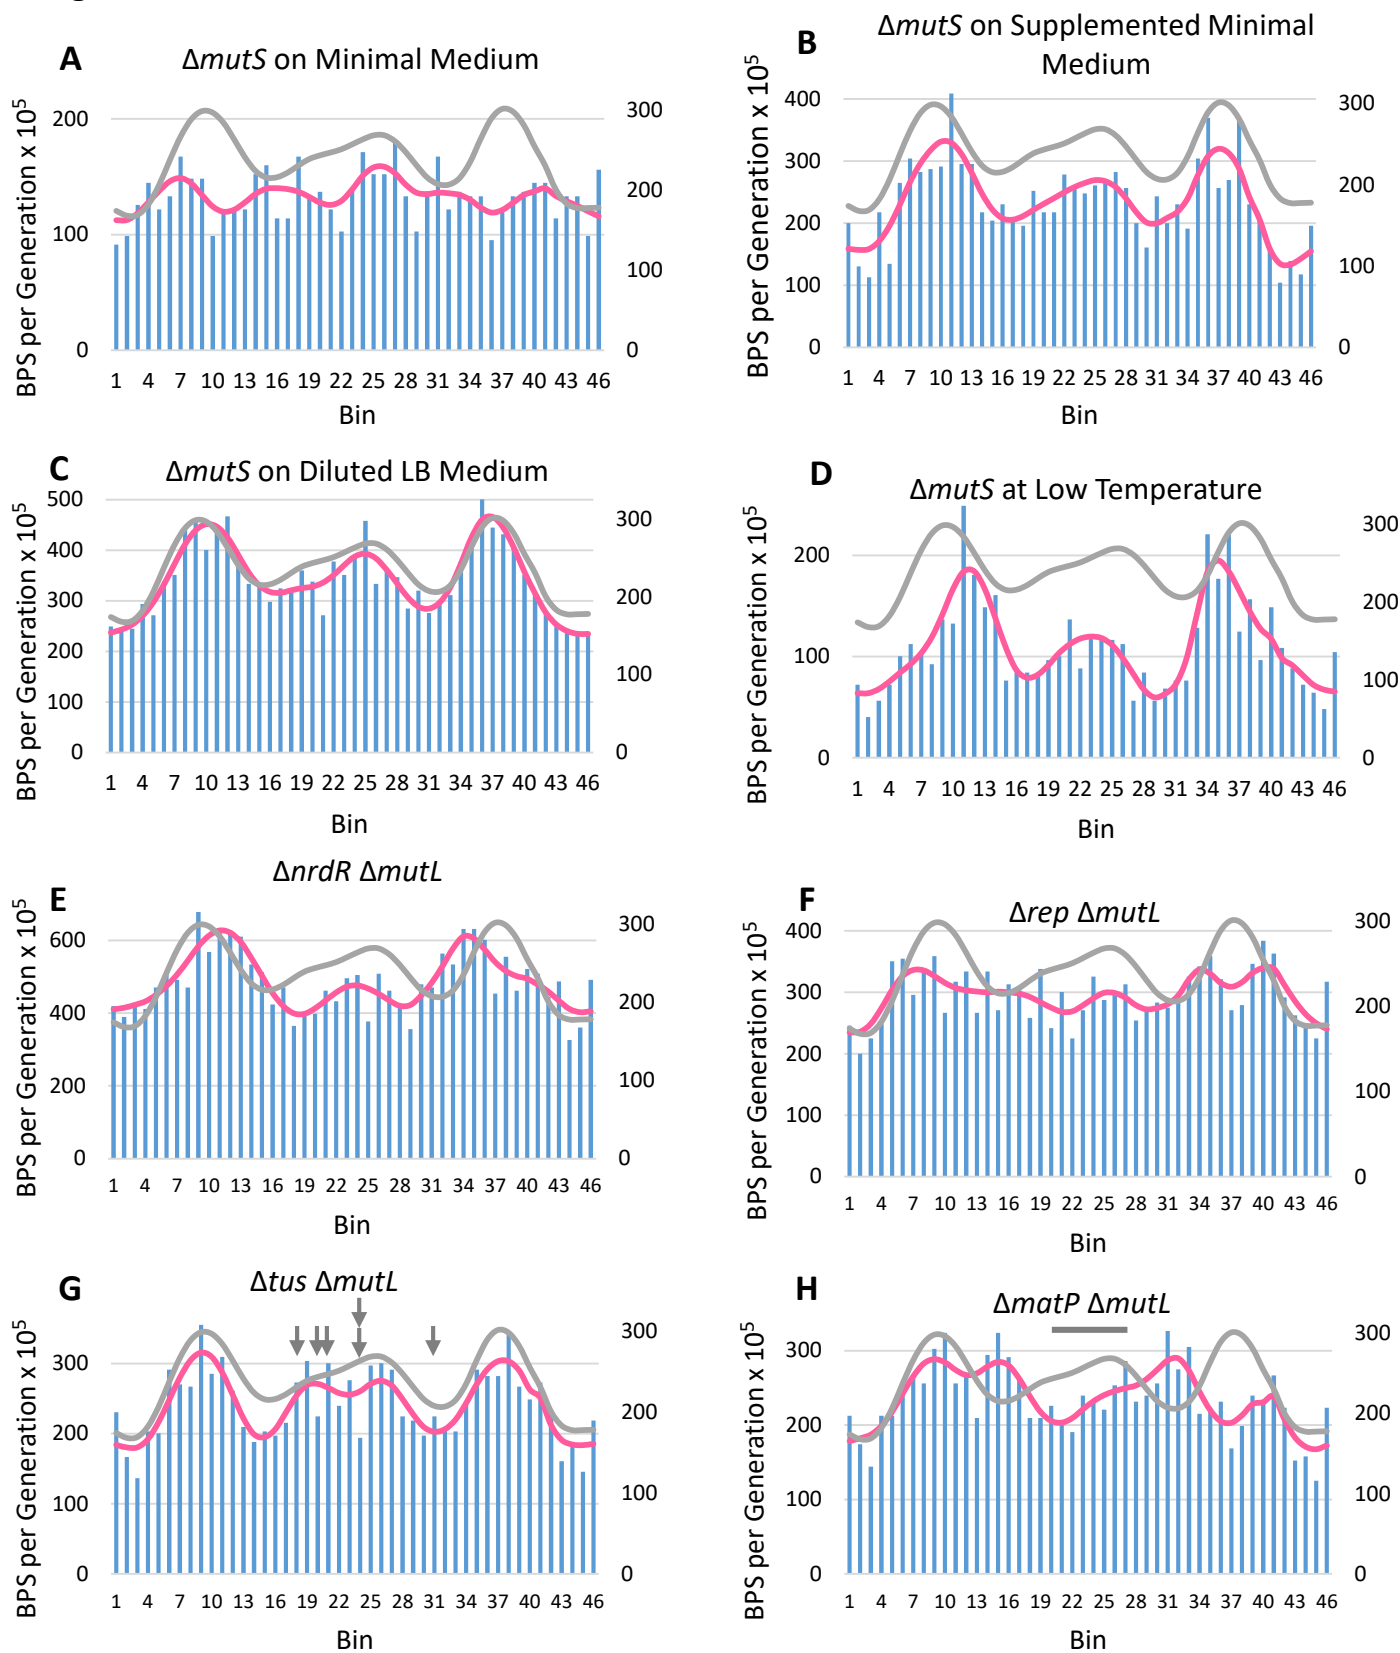

**Figure 3**

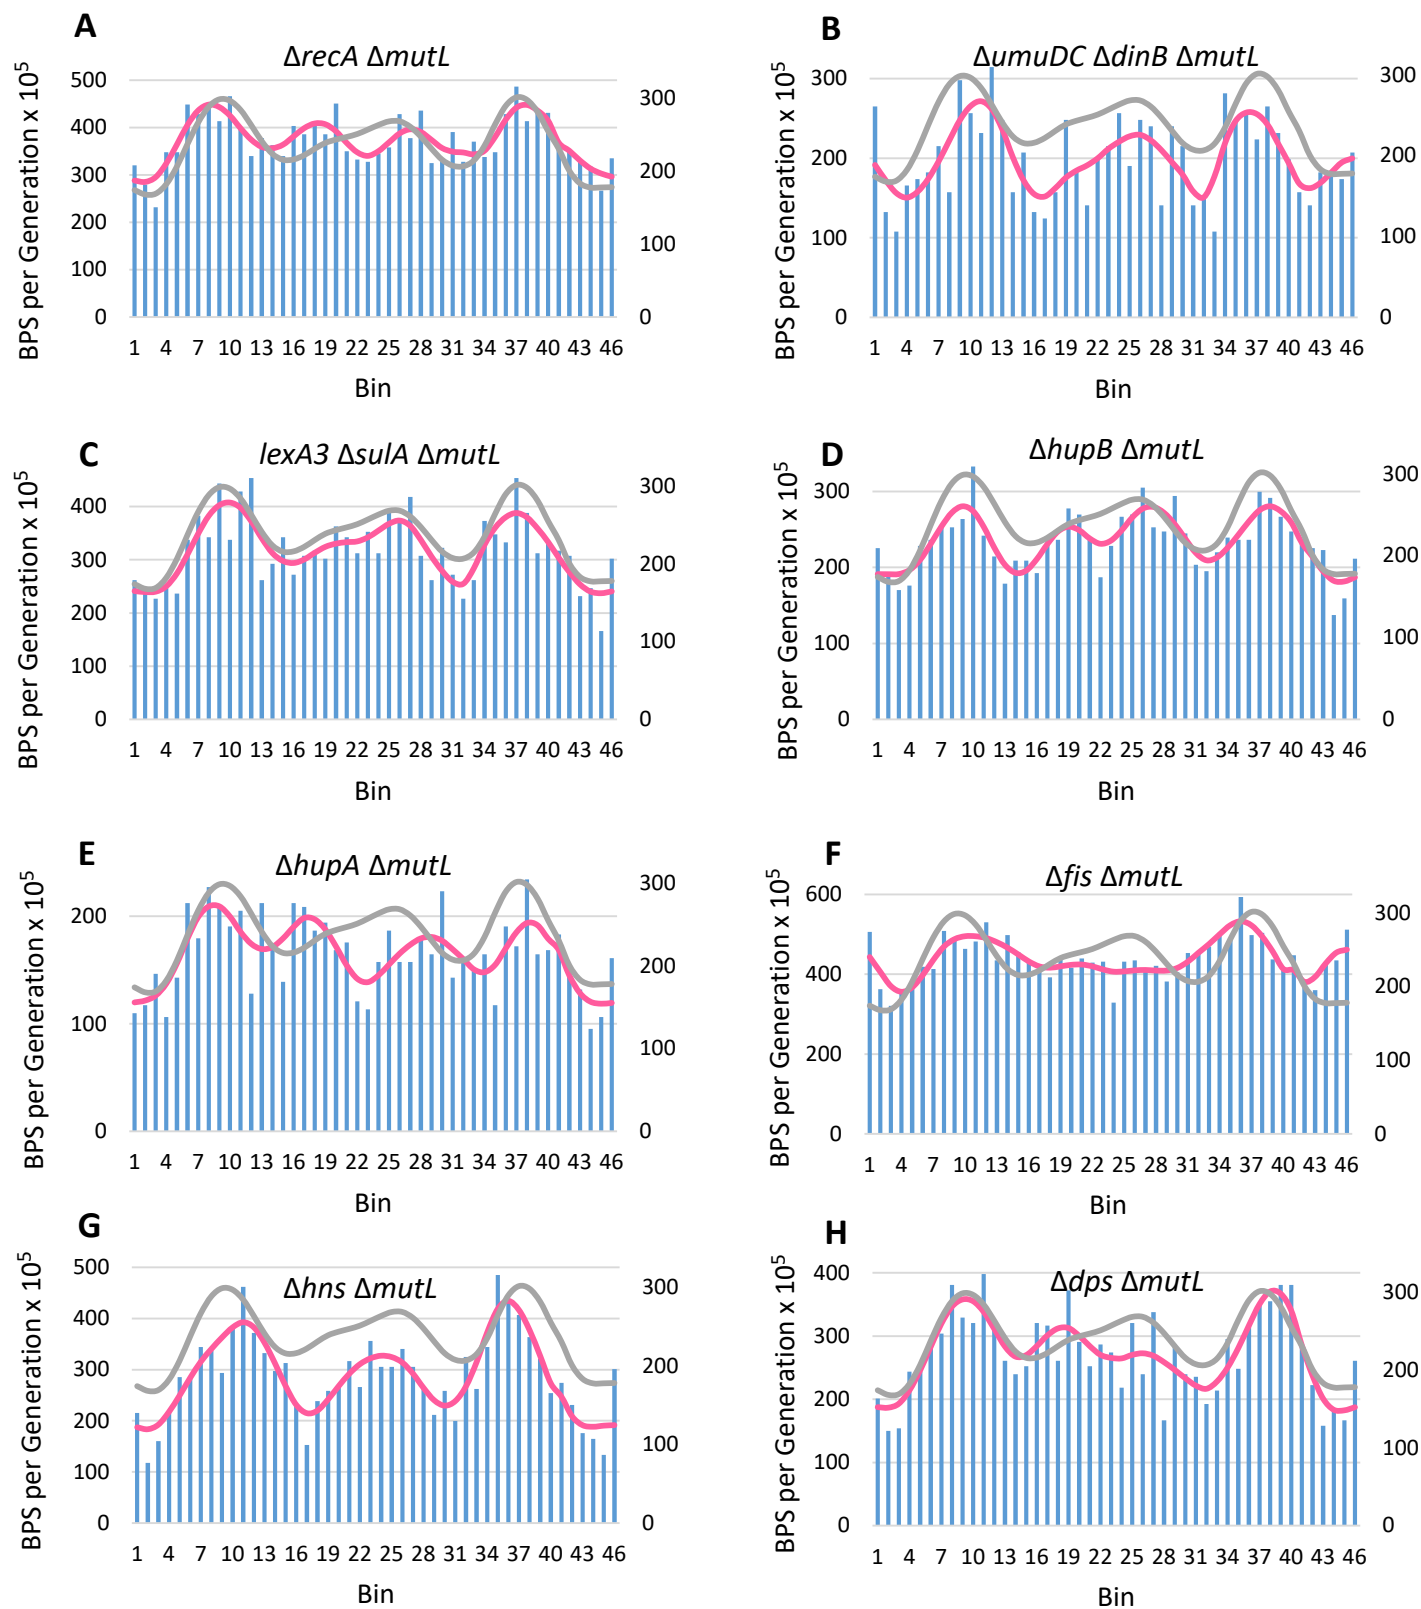

Figure 4

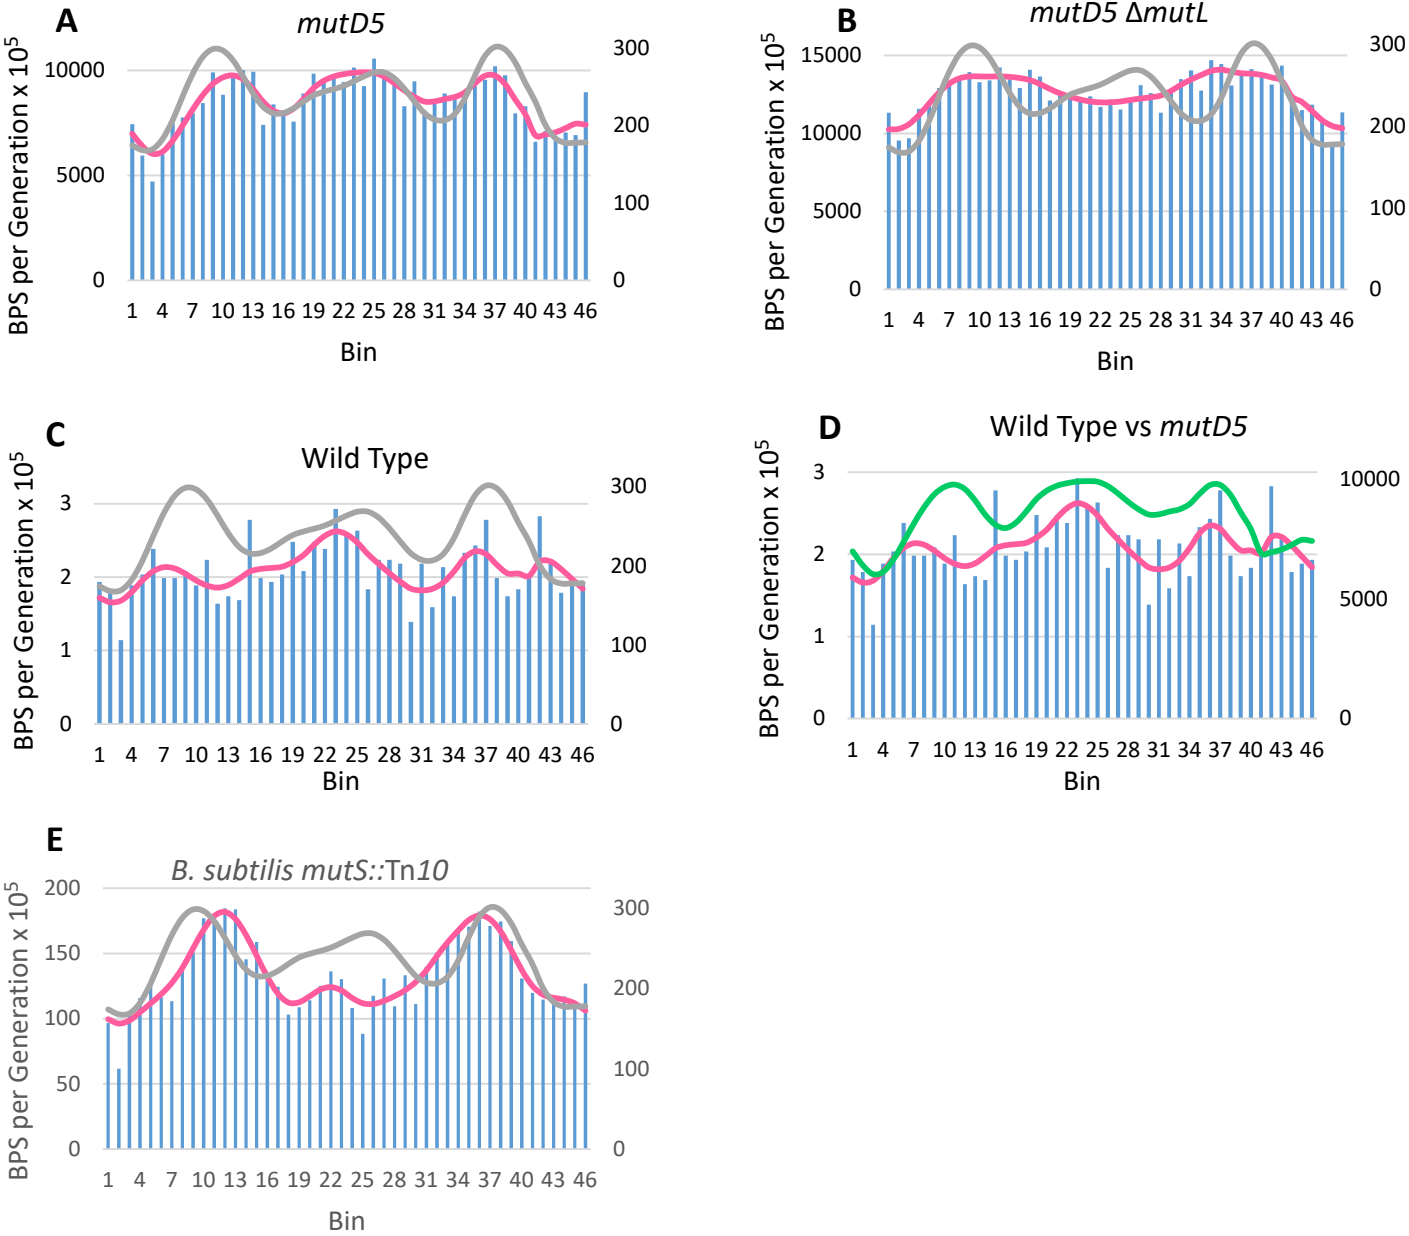

Source: https://www.biorxiv.org/content/biorxiv/early/2019/01/17/523696.full.pdf
